# Supplementary material for: BS-virus-finder: virus integration calling using bisulfite sequencing data
Source: PubMed Central journal article supplement (PMC5788064; doi:10.1093/gigascience/gix123), 2017-12-18

## BS-virus-finder: virus integration calling using bisulfite-sequencing data --Manuscript Draft--

|                                                      |                                                                                                                                                                                                                                                                                                                                                                                                                                                                                                                                                                                                                                                                                                                                                                                                                        |                  |
|------------------------------------------------------|------------------------------------------------------------------------------------------------------------------------------------------------------------------------------------------------------------------------------------------------------------------------------------------------------------------------------------------------------------------------------------------------------------------------------------------------------------------------------------------------------------------------------------------------------------------------------------------------------------------------------------------------------------------------------------------------------------------------------------------------------------------------------------------------------------------------|------------------|
| <b>Manuscript Number:</b>                            | GIGA-D-17-00032                                                                                                                                                                                                                                                                                                                                                                                                                                                                                                                                                                                                                                                                                                                                                                                                        |                  |
| <b>Full Title:</b>                                   | BS-virus-finder: virus integration calling using bisulfite-sequencing data                                                                                                                                                                                                                                                                                                                                                                                                                                                                                                                                                                                                                                                                                                                                             |                  |
| <b>Article Type:</b>                                 | Data Note                                                                                                                                                                                                                                                                                                                                                                                                                                                                                                                                                                                                                                                                                                                                                                                                              |                  |
| <b>Funding Information:</b>                          | Young Scientists Fund of the National Natural Science Foundation of China (009142)                                                                                                                                                                                                                                                                                                                                                                                                                                                                                                                                                                                                                                                                                                                                     | Dr. Shengjie Gao |
| <b>Abstract:</b>                                     | <p>Background: DNA methylation plays a key role in regulating gene expression and carcinogenesis. Extant methylation bisulfite sequencing (BS) researches mainly focus on calling SNP, DMR, and ASM, instead of virus integration positions.</p> <p>Findings: We developed a new and easy-to-use software, named as BS-virus-finder (<a href="https://github.com/BioInfoTools/BSVF">https://github.com/BioInfoTools/BSVF</a>), to detect viral integration breakpoints in whole human genomes.</p> <p>Conclusions: BS-virus-finder demonstrates moderate sensitivity and specificity, and is useful to be applied in epigenetic researches and to reveal the relationship between viral integration and DNA methylation. BS-virus-finder is the first software to detect virus by using bisulfite sequencing data.</p> |                  |
| <b>Corresponding Author:</b>                         | Christian Pedersen<br><br>DENMARK                                                                                                                                                                                                                                                                                                                                                                                                                                                                                                                                                                                                                                                                                                                                                                                      |                  |
| <b>Corresponding Author Secondary Information:</b>   |                                                                                                                                                                                                                                                                                                                                                                                                                                                                                                                                                                                                                                                                                                                                                                                                                        |                  |
| <b>Corresponding Author's Institution:</b>           |                                                                                                                                                                                                                                                                                                                                                                                                                                                                                                                                                                                                                                                                                                                                                                                                                        |                  |
| <b>Corresponding Author's Secondary Institution:</b> |                                                                                                                                                                                                                                                                                                                                                                                                                                                                                                                                                                                                                                                                                                                                                                                                                        |                  |
| <b>First Author:</b>                                 | Shengjie Gao, Ph.D                                                                                                                                                                                                                                                                                                                                                                                                                                                                                                                                                                                                                                                                                                                                                                                                     |                  |
| <b>First Author Secondary Information:</b>           |                                                                                                                                                                                                                                                                                                                                                                                                                                                                                                                                                                                                                                                                                                                                                                                                                        |                  |
| <b>Order of Authors:</b>                             | Shengjie Gao, Ph.D<br>Xuesong Hu<br>Changduo Gao<br>Kai Xiong<br>Shancen Zhao<br>Mengyao Wang<br>Xiaohui Zhao<br>Jie Bai<br>Bo Li<br>Song Wu<br>Shengbin Li<br>Huanming Yang<br>Lars Bolund<br>Christian Pedersen                                                                                                                                                                                                                                                                                                                                                                                                                                                                                                                                                                                                      |                  |
| <b>Order of Authors Secondary Information:</b>       |                                                                                                                                                                                                                                                                                                                                                                                                                                                                                                                                                                                                                                                                                                                                                                                                                        |                  |
| <b>Opposed Reviewers:</b>                            |                                                                                                                                                                                                                                                                                                                                                                                                                                                                                                                                                                                                                                                                                                                                                                                                                        |                  |

| Additional Information:                                                                                                                                                                                                                                                                                                                                                                                                                                                                                                                                 |          |
|---------------------------------------------------------------------------------------------------------------------------------------------------------------------------------------------------------------------------------------------------------------------------------------------------------------------------------------------------------------------------------------------------------------------------------------------------------------------------------------------------------------------------------------------------------|----------|
| Question                                                                                                                                                                                                                                                                                                                                                                                                                                                                                                                                                | Response |
| Are you submitting this manuscript to a special series or article collection?                                                                                                                                                                                                                                                                                                                                                                                                                                                                           | No       |
| <p><b>Experimental design and statistics</b></p> <p>Full details of the experimental design and statistical methods used should be given in the Methods section, as detailed in our <a href="#">Minimum Standards Reporting Checklist</a>. Information essential to interpreting the data presented should be made available in the figure legends.</p> <p>Have you included all the information requested in your manuscript?</p>                                                                                                                      | Yes      |
| <p><b>Resources</b></p> <p>A description of all resources used, including antibodies, cell lines, animals and software tools, with enough information to allow them to be uniquely identified, should be included in the Methods section. Authors are strongly encouraged to cite <a href="#">Research Resource Identifiers</a> (RRIDs) for antibodies, model organisms and tools, where possible.</p> <p>Have you included the information requested as detailed in our <a href="#">Minimum Standards Reporting Checklist</a>?</p>                     | Yes      |
| <p><b>Availability of data and materials</b></p> <p>All datasets and code on which the conclusions of the paper rely must be either included in your submission or deposited in <a href="#">publicly available repositories</a> (where available and ethically appropriate), referencing such data using a unique identifier in the references and in the “Availability of Data and Materials” section of your manuscript.</p> <p>Have you have met the above requirement as detailed in our <a href="#">Minimum Standards Reporting Checklist</a>?</p> | Yes      |

# BS-virus-finder: virus integration calling using bisulfite-sequencing data

Shengjie Gao<sup>1,2,7,8,9\*</sup>, Xuesong Hu<sup>2\*</sup>, Changduo Gao<sup>3\*</sup>, Kai Xiong<sup>4\*</sup>, Shancen Zhao<sup>5,7</sup>, Mengyao Wang<sup>5</sup>, Xiaohui Zhao<sup>6</sup>, Jie Bai<sup>5</sup>, Bo Li<sup>2</sup>, Song Wu<sup>9</sup>, Shengbin Li<sup>2</sup>, Huangming Yang<sup>5, 7#</sup>, Lars Bolund<sup>8#</sup>, Christian N. S. Pedersen<sup>1#</sup>

<sup>1</sup> Bioinformatics Research Centre, Aarhus University, Aarhus, Denmark

<sup>2</sup> BGI-Forensic, Shenzhen 518083, China

<sup>3</sup> College of Computer Science & Technology, Qingdao University, Qingdao 266071, China

<sup>4</sup> Department of Veterinary Clinical and Animal Sciences, University of Copenhagen, Copenhagen, Denmark

<sup>5</sup> BGI-Shenzhen, Shenzhen 518083, China

<sup>6</sup> College Of Mathematics & Statistics, Changsha University of Science & Technology, Changsha 410114, China

<sup>7</sup> James D. Watson Institute of Genome Sciences, Hangzhou 310058, China

<sup>8</sup> Department of Biomedicine, Aarhus University, Aarhus, Denmark

<sup>9</sup> The Affiliated Luohu Hospital of Shenzhen University, Shenzhen University, Shenzhen 518000, China.

\* These authors contributed equally to this work

# These authors equally directed the work

1 **Abstract:**

2 **Background:** DNA methylation plays a key role in regulating gene expression and  
3 carcinogenesis. Extant methylation bisulfite sequencing (BS) researches mainly focus on calling  
4 SNP, DMR, and ASM, instead of virus integration positions.

5 **Findings:** We developed a new and easy-to-use software, named as BS-virus-finder  
6 (<https://github.com/BioInfoTools/BSVF>), to detect viral integration breakpoints in whole  
7 human genomes.

8 **Conclusions:** BS-virus-finder demonstrates moderate sensitivity and specificity, and is useful  
9 to be applied in epigenetic researches and to reveal the relationship between viral integration  
10 and DNA methylation. BS-virus-finder is the first software to detect virus by using bisulfite  
11 sequencing data.

12 **Keyword:** Virus integration, Bisulfite sequencing, Carcinogenesis

13  
14  
15  
16  
17

# 1 Findings

## 2 Introduction

3 DNA methylation plays crucial roles in many areas including development [3, 4] and X  
4 chromosome inactivation [5] by regulating genetic imprinting and epigenetic modification  
5 without altering DNA sequences. Previous researches showed strong association of DNA  
6 methylation with cancer. The methylation status altering related carcinogenesis [6], cancer  
7 recurrence [7] and metastasis [8] were already revealed by emerging bisulfite sequencing  
8 technology (BS). BS technology can investigate DNA methylation changes with the single-base  
9 accuracy. Treatment of DNA with bisulfite converts cytosine residues to uracil, but leaves 5-  
10 methylcytosine residues unmodified [9]. Thus, bisulfite treatment introduces specific changes  
11 in the DNA sequence that depend on the methylation status of individual cytosine residues,  
12 yielding single-nucleotide resolution information about the methylation status of a segment of  
13 DNA. Various analyses can be performed on the altered sequences to retrieve this information.  
14 BS technology can reveal differences between SNP (cytosines and thymidine) and sequence  
15 change resulting from bisulfite conversion. Whole-genome based bisulfite sequencing (Bis-seq)  
16 has been developed to detect DNA methylation. A recent clinical study showed that DNA  
17 methylation is associated with viral integration [10]. Whole-genome BS (WGBS) data can be  
18 analyzed to investigate the sequence mapping and alignment via BSMAP [11], Bismark [12]  
19 and BWA-meth [13], to detect DMR via software QDMR [14], DMAP [15] and SMAP [11], to  
20 identify SNP via software BS-SNPper [2] and Bis-SNP [16], and finding ASM via SMAP [1],

1 Methy-Pipe [17]. However, none of them can be used for virus integration loci calling, and no  
2 software is currently available to detect virus integration loci by analyzing BS data. Therefore,  
3 we developed the software to detect the virus integration loci by genome-wide BS analysis.

#### 5 **Data description in silico**

6 PE reads (90bp) that include 700 breakpoints in chromosome 18 (chr.18) of GRCh38 were  
7 simulated in our study. Input fragments of 50 to 400 bp were randomly selected from  
8 chromosome 18 in the GRCh37 assembly (hg19) of the human genome. The length of viral  
9 integration was between 45bp to 180 bp. After the alignment, the mapping accuracy of each of  
10 the 17 different types of reads mapping was calculated. Mapping accuracy varied among the 17  
11 types of read mappings in our simulation (Figure S1, S2, S3). In summary, the accuracies of  
12 several kinds of the reads mappings were low (Table S1, S2, S3), which may raise false-negative  
13 rate. Generally, however, bwa-meth [13] performed very well. It indicated virus breakpoints  
14 might be hardly found by our BS virus finder.

15 Bisulfite sequencing is a marvelous and sophisticated technique to study DNA cytosine  
16 methylation. Bisulfite treatment followed by PCR amplification specifically converts  
17 methylated cytosine to thymine. By cooperating with next generation sequencing technology, it  
18 is able to detect the methylation status of every cytosine in the whole genome. Moreover, longer  
19 as the read is, higher accuracy can be achieved.

20

# 1 Method for calling virus integration

2 Four steps were implemented to obtain virus integration:

## 3 1. Alignment

4 The first step is alignment. We used Bwa-meth to align junction reads and mark the shorter  
5 junction parts as soft-clip, which enables us to find breakpoints directly from the alignment.

## 6 2. Clustering

7 After the alignment, the result was filtered based on sequencing quality, mapping quality and  
8 mismatch rates. Then, all reads surrounding or containing breakpoints were identified to form  
9 clusters. As the figure shows (Figure 1), there are 17 kinds of mapping reads with the  
10 information of viral integration. Each cluster contains one or more of such reads. Clusters are  
11 extended until no more overlapped paired end (PE) reads found.

## 12 3. Assembling

13 Based on the results of clustering, we identified the most likely candidate breakpoints to predict  
14 the most possible virus sequence candidates. Within these candidates, our restore algorithm was  
15 used to calculate the most possible base in each region, and then to find the integration region  
16 of virus (Figure 2). Furthermore, we can calculate maximum a posteriori probability estimate  
17 for A, C, G, T as:

$$\begin{aligned} P(T_i | D) &= \frac{P(T_{wi})P(D | T_{wi})}{\sum_{x=1}^S P(T_{wx})P(D | T_{wx})} \times \frac{P(T_{ci})P(D | T_{ci})}{\sum_{x=1}^S P(T_{cx})P(D | T_{cx})} \\ &= C_0 \times P(D | T_{wi}) \times P(D | T_{ci}) \\ C_0 &= \frac{P(T_{wi})}{\sum_{x=1}^S P(T_{wx})P(D | T_{wx})} \times \frac{P(T_{ci})}{\sum_{x=1}^S P(T_{cx})P(D | T_{cx})} \end{aligned}$$

18  
19 D be a realization (or observation) of the NGS reads. P(Ti|D) is the likelihood component, which  
20 can be interpreted as the probability of observing D when the true genotype is Ti. Dw be a

1 realization (or observation) of the NGS reads in Watson strand.  $D_C$  be a realization (or  
2 observation) of the NGS reads in Crick strand.  $P(T_{Wi}|D)$  is the likelihood component, which can  
3 be interpreted as the probability of observing  $D$  when the true genotype is  $T_{Wi}$ .  $P(T_{Ci}|D)$  is the  
4 likelihood component, which can be interpreted as the probability of observing  $D$  when the true  
5 genotype is  $T_{Ci}$ . At each genomic location, prior probability  $P(T_i)$  of each genotype  $T_i$  was set  
6 according to the reference genotype. The likelihood  $P(D|T_i)$  for the assumed genotype  $T_i$  was  
7 calculated from the observed allele types in the sequencing reads. Thus, on Watson strand it is  
8  $P(D_W|T_i)$ , on Crick strand it is  $P(D_C|T_i)$ . We defined the likelihood of observing allele  $d_k$  in a  
9 read for a possible haploid genotype  $T$  as  $P(d_k|T)$ , and on Watson strand it is  $P(d_{wk}|T)$ , on Crick  
10 strand it is  $P(d_{ck}|T)$ . So, for a set of  $n$  total observed alleles at a locus,  $D = \{d_1, d_2, \dots, d_n\}$  on  
11 each strand.

$$P(D_W | T_i) = \prod_{k=1}^m P(d_{wk} | T), P(D_C | T_i) = \prod_{k=1}^n P(d_{ck} | T).$$

$$P(d_{wk} | T) = \begin{cases} 1 - 10^{-\frac{Q}{10}} & (T \in \{A, C, G\}) \\ \frac{1 - 10^{-\frac{Q}{10}}}{2} & (T \in \{T\}) \end{cases},$$

$$P(d_{ck} | T) = \begin{cases} 1 - 10^{-\frac{Q}{10}} & (T \in \{C, G, T\}) \\ \frac{1 - 10^{-\frac{Q}{10}}}{2} & (T \in \{A\}) \end{cases}.$$

14 For the bases without methylation, and all G changed to A on Crick strand. Thus we used “Y”  
15 and “R” to represent C/T and G/A respectively (IUPAC nucleotide code). If a region is covered  
16 by both Watson strand and Crick strand, we were able to reveal the original base from Y or R  
17 by calculation. The unmapped regions above hereby mapped to the given virus reference  
18 sequence with the Smith-Waterman local alignment tool [18], which support IUPAC DNA  
19 codes. Virus fragment location is extracted from the alignment result. As shown in Figure 3.



1  
2  
3  
4  
5  
6  
7  
8  
9  
10  
11  
12  
13  
14  
15  
16  
17  
18  
19  
20  
21  
22  
23  
24  
25  
26  
27  
28  
29  
30  
31  
32  
33  
34  
35  
36  
37  
38  
39  
40  
41  
42  
43  
44  
45  
46  
47  
48  
49  
50  
51  
52  
53  
54  
55  
56  
57  
58  
59  
60  
61  
62  
63  
64  
65

#### 4. Detection of viral integrations

The unmapped regions were thereby mapped to the given virus reference sequence with the Smith-Waterman local alignment tool [18], which support IUPAC DNA codes. Virus fragment location is extracted from the alignment results.

### Discussion

In summary, we implemented the first software to detect virus integration using BS data. Our software is based on Bwa-meth. By identifying soft-clip, it can easily find the virus breakpoints. However, accuracy of reads surrounding the breakpoints needs to be further improved. Virus usually integrates into regions that homologous to both human and virus (micro-homologous). Therefore, the breakpoints predicted by our software within the nearest 10 bp around the real breakpoint were considered as the perfect results (Figure S2). The accuracy of predicted breakpoints can reach over 70%. Our results will be useful for analyzing BS data and relative applications. Some of the results come with only location on human genome, and the virus location is missing. This may due to the shortage of virus fragments. We stimulated three kinds of reads, PE50, 90,150 with various length, and further stimulated virus-inserted fragment with different length as well (Table 1), thus all cases described in Figure 1 are mimic here. As the result in Table 1 showed, the longer the reads, the more accurate the prediction can be achieved. Particularly, the result in Table1 demonstrated that Bs-virus-finder is capable to find more than

1 80% of virus integration with the accuracy more than 90%. Taking together, we hereby provided  
2  
3  
4 a powerful tool to analyze virus-integration using BS data.  
5

6  
7 3

#### 8 9 4 **Availability and requirements**

10  
11  
12 5 Project Name: BS-virus-finder: virus integration calling using bisulfite-sequencing data

13  
14  
15 6 Project home page: <https://github.com/BioInfoTools/BSVF>

16  
17  
18 7 Operating system: Linux

19  
20  
21 8 Programming language: Perl and Python

22  
23  
24 9 License: GPL v3

25  
26  
27 10

#### 28 29 11 **Availability of supporting data**

30  
31  
32 12 Data used in this paper is simulated based on random insertion of HBV sequence to human  
33  
34  
35 13 chromosome 1 sequence. A Perl script named “simVirusInserts.pl” is included, and our  
36  
37  
38 14 simulation schema is coded within. We have run the simulation several times and the result  
39  
40  
41 15 shows no significant difference.  
42

43  
44  
45 16

#### 46 47 17 **Competing interests**

48  
49 18 The authors declare that they have no competing interests.  
50

51  
52  
53 19

#### 54 55 20 **Acknowledgements**

56  
57 21 We appreciate the supporting of Xiaolin Liang and Hengtong Li in College of Mathematics &  
58  
59  
60 22 Statistics, Changsha University of Science & Technology, for their contributing advice to our  
61  
62  
63  
64  
65

1 research. This work was supported financially by the Young Scientists Fund of the National  
2  
3  
4 Natural Science Foundation of China (grant no. 009142).

5  
6  
7  
8  
9  
10  
11  
12  
13  
14  
15  
16  
17  
18  
19  
20  
21  
22  
23  
24  
25  
26  
27  
28  
29  
30  
31  
32  
33  
34  
35  
36  
37  
38  
39  
40  
41  
42  
43  
44  
45  
46  
47  
48  
49  
50  
51  
52  
53  
54  
55  
56  
57  
58  
59  
60  
61  
62  
63  
64  
65

4 **References:**

- 5 1. Gao S, Zou D, Mao L, Zhou Q, Jia W, Huang Y, Zhao S, Chen G, Wu S, Li D *et al*: **SMAP: a streamlined methylation analysis pipeline for bisulfite sequencing.** *GigaScience* 2015, **4**:29.
- 6 2. Gao S, Zou D, Mao L, Liu H, Song P, Chen Y, Zhao S, Gao C, Li X, Gao Z *et al*: **BS-SNPer: SNP calling in bisulfite-seq data.** *Bioinformatics* 2015, **31**(24):4006-4008.
- 7 3. Wang Y, Shang Y: **Epigenetic control of epithelial-to-mesenchymal transition and cancer metastasis.** *Experimental cell research* 2013, **319**(2):160-169.
- 8 4. O'Doherty AM, Magee DA, O'Shea LC, Forde N, Beltman ME, Mamo S, Fair T: **DNA methylation dynamics at imprinted genes during bovine pre-implantation embryo development.** *BMC developmental biology* 2015, **15**:13.
- 9 5. Cotton AM, Price EM, Jones MJ, Balaton BP, Kobor MS, Brown CJ: **Landscape of DNA methylation on the X chromosome reflects CpG density, functional chromatin state and X-chromosome inactivation.** *Human molecular genetics* 2015, **24**(6):1528-1539.
- 10 6. Kamdar SN, Ho LT, Kron KJ, Isserlin R, van der Kwast T, Zlotta AR, Fleshner NE, Bader G, Bapat B: **Dynamic interplay between locus-specific DNA methylation and hydroxymethylation regulates distinct biological pathways in prostate carcinogenesis.** *Clinical epigenetics* 2016, **8**:32.
- 11 7. Haldrup C, Mundbjerg K, Vestergaard EM, Lamy P, Wild P, Schulz WA, Arsov C, Visakorpi T, Borre M, Hoyer S *et al*: **DNA methylation signatures for prediction of biochemical recurrence after radical prostatectomy of clinically localized prostate cancer.** *Journal of clinical oncology : official journal of the American Society of Clinical Oncology* 2013, **31**(26):3250-3258.
- 12 8. Kim JH, Dhanasekaran SM, Prensner JR, Cao X, Robinson D, Kalyana-Sundaram S, Huang C, Shankar S, Jing X, Iyer M *et al*: **Deep sequencing reveals distinct patterns of DNA methylation in prostate cancer.** *Genome research* 2011, **21**(7):1028-1041.
- 13 9. Darst RP, Pardo CE, Ai L, Brown KD, Kladde MP: **Bisulfite sequencing of DNA.** *Current protocols in molecular biology / edited by Frederick M Ausubel [et al]* 2010, **Chapter 7**:Unit 7 9 1-17.
- 14 10. Lillsunde Larsson G, Helenius G, Sorbe B, Karlsson MG: **Viral load, integration and methylation of E2B3 and 4 in human papilloma virus (HPV) 16-positive vaginal and vulvar carcinomas.** *PloS one* 2014, **9**(11):e112839.

1  
2  
3  
4  
5  
6  
7  
8  
9  
10  
11  
12  
13  
14  
15  
16  
17  
18  
19  
20  
21  
22  
23  
24  
25  
26  
27  
28  
29  
30  
31  
32  
33  
34  
35  
36  
37  
38  
39  
40  
41  
42  
43  
44  
45  
46  
47  
48  
49  
50  
51  
52  
53  
54  
55  
56  
57  
58  
59  
60  
61  
62  
63  
64  
65

11. Xi Y, Li W: **BSMAP: whole genome bisulfite sequence MAPping program.** *BMC bioinformatics* 2009, **10**:232.

12. Krueger F, Andrews SR: **Bismark: a flexible aligner and methylation caller for Bisulfite-Seq applications.** *Bioinformatics* 2011, **27**(11):1571-1572.

13. Pedersen BS EK, De S, Yang IV, Schwartz DA: **Fast and accurate alignment of long bisulfite-seq reads.** *eprint arXiv* 2014, **14011129**

14. Zhang Y, Liu H, Lv J, Xiao X, Zhu J, Liu X, Su J, Li X, Wu Q, Wang F *et al*: **QDMR: a quantitative method for identification of differentially methylated regions by entropy.** *Nucleic acids research* 2011, **39**(9):e58.

15. Stockwell PA, Chatterjee A, Rodger EJ, Morison IM: **DMAP: differential methylation analysis package for RRBS and WGBS data.** *Bioinformatics* 2014.

16. Liu Y, Siegmund KD, Laird PW, Berman BP: **Bis-SNP: Combined DNA methylation and SNP calling for Bisulfite-seq data.** *Genome biology* 2012, **13**(7):R61.

17. Jiang P, Sun K, Lun FM, Guo AM, Wang H, Chan KC, Chiu RW, Lo YM, Sun H: **MethyPipe: an integrated bioinformatics pipeline for whole genome bisulfite sequencing data analysis.** *PloS one* 2014, **9**(6):e100360.

18. Rice P, Longden I, Bleasby A: **EMBOSS: the European Molecular Biology Open Software Suite.** *Trends in genetics : TIG* 2000, **16**(6):276-277.

1 **Table 1. The performance of BS-virus-finder.**

| Read Length | PE Insert Length | Virus Length | True Positive |        | HumOnly |        | VirNA |        | HumCalled % | False Positive |        |
|-------------|------------------|--------------|---------------|--------|---------|--------|-------|--------|-------------|----------------|--------|
|             |                  |              | Cnt           | %      | Cnt     | %      | Cnt   | %      |             | Cnt            | %      |
| 50          | 60               | 25           | 454           | 64.86% | 22      | 3.14%  | 119   | 17.00% | 85.00%      | 1              | 0.14%  |
|             | 80               | 25           | 438           | 62.57% | 30      | 4.29%  | 174   | 24.86% | 91.71%      | 7              | 1.00%  |
|             | 80               | 67           | 640           | 91.43% | 2       | 0.29%  | 0     | 0.00%  | 91.71%      | 4              | 0.57%  |
|             | 120              | 5            | 51            | 7.29%  | 479     | 68.43% | 52    | 7.43%  | 83.14%      | 1              | 0.14%  |
|             | 120              | 10           | 76            | 10.86% | 428     | 61.14% | 160   | 22.86% | 94.86%      | 9              | 1.29%  |
|             | 120              | 20           | 512           | 73.14% | 29      | 4.14%  | 131   | 18.71% | 96.00%      | 1              | 0.14%  |
|             | 120              | 25           | 450           | 64.29% | 28      | 4.00%  | 191   | 27.29% | 95.57%      | 3              | 0.43%  |
|             | 120              | 67           | 581           | 83.00% | 13      | 1.86%  | 74    | 10.57% | 95.43%      | 3              | 0.43%  |
|             | 120              | 100          | 673           | 96.14% | 1       | 0.14%  | 0     | 0.00%  | 96.29%      | 11             | 1.57%  |
|             | 250              | 67           | 262           | 37.43% | 266     | 38.00% | 20    | 2.86%  | 78.29%      | 0              | 0.00%  |
| 90          | 100              | 45           | 569           | 81.29% | 0       | 0.00%  | 109   | 15.57% | 96.86%      | 60             | 8.57%  |
|             | 150              | 45           | 570           | 81.43% | 2       | 0.29%  | 115   | 16.43% | 98.14%      | 38             | 5.43%  |
|             | 150              | 120          | 585           | 83.57% | 11      | 1.57%  | 94    | 13.43% | 98.57%      | 72             | 10.29% |
|             | 200              | 5            | 45            | 6.43%  | 539     | 77.00% | 66    | 9.43%  | 92.86%      | 0              | 0.00%  |
|             | 200              | 10           | 213           | 30.43% | 295     | 42.14% | 151   | 21.57% | 94.14%      | 1              | 0.14%  |
|             | 200              | 20           | 498           | 71.14% | 37      | 5.29%  | 123   | 17.57% | 94.00%      | 3              | 0.43%  |
|             | 200              | 45           | 570           | 81.43% | 1       | 0.14%  | 116   | 16.57% | 98.14%      | 24             | 3.43%  |
|             | 200              | 120          | 692           | 98.86% | 0       | 0.00%  | 0     | 0.00%  | 98.86%      | 78             | 11.14% |
|             | 200              | 180          | 616           | 88.00% | 8       | 1.14%  | 65    | 9.29%  | 98.43%      | 71             | 10.14% |
|             | 420              | 120          | 689           | 98.43% | 0       | 0.00%  | 0     | 0.00%  | 98.43%      | 30             | 4.29%  |
| 150         | 150              | 75           | 477           | 68.14% | 6       | 0.86%  | 209   | 29.86% | 98.86%      | 97             | 13.86% |
|             | 220              | 75           | 576           | 82.29% | 1       | 0.14%  | 114   | 16.29% | 98.71%      | 57             | 8.14%  |
|             | 220              | 200          | 691           | 98.71% | 0       | 0.00%  | 0     | 0.00%  | 98.71%      | 68             | 9.71%  |
|             | 350              | 5            | 50            | 7.14%  | 554     | 79.14% | 67    | 9.57%  | 95.86%      | 0              | 0.00%  |
|             | 350              | 10           | 69            | 9.86%  | 447     | 63.86% | 158   | 22.57% | 96.29%      | 0              | 0.00%  |
|             | 350              | 20           | 513           | 73.29% | 37      | 5.29%  | 126   | 18.00% | 96.57%      | 2              | 0.29%  |
|             | 350              | 75           | 474           | 67.71% | 6       | 0.86%  | 212   | 30.29% | 98.86%      | 42             | 6.00%  |

|     |     |     |        |    |       |   |       |        |    |       |
|-----|-----|-----|--------|----|-------|---|-------|--------|----|-------|
| 350 | 200 | 691 | 98.71% | 0  | 0.00% | 0 | 0.00% | 98.71% | 43 | 6.14% |
| 350 | 300 | 678 | 96.86% | 10 | 1.43% | 2 | 0.29% | 98.57% | 62 | 8.86% |
| 530 | 200 | 691 | 98.71% | 0  | 0.00% | 0 | 0.00% | 98.71% | 35 | 5.00% |

1  
2  
3  
4  
5  
6  
7  
8  
9  
10  
11  
12  
13  
14  
15  
16  
17  
18  
19  
20  
21  
22  
23  
24  
25  
26  
27  
28  
29  
30  
31  
32  
33  
34  
35  
36  
37  
38  
39  
40  
41  
42  
43  
44  
45  
46  
47  
48  
49  
50  
51  
52  
53  
54  
55  
56  
57  
58  
59  
60  
61  
62  
63  
64  
65

\* We simulated 700 virus insertion events in each row.  
 Correct: Distance between simulated and found point is within 10 bp range.  
 True Positive: Both human split site and virus split site are correct. False Positive: Human split site is wrong.  
 HumOnly: Human split site is right but virus split site is wrong.  
 VirNA: Human split site is right but virus split site is not found.  
 HumCalled: Sum of left (all listed except for FP), which is the called rate on human genome.

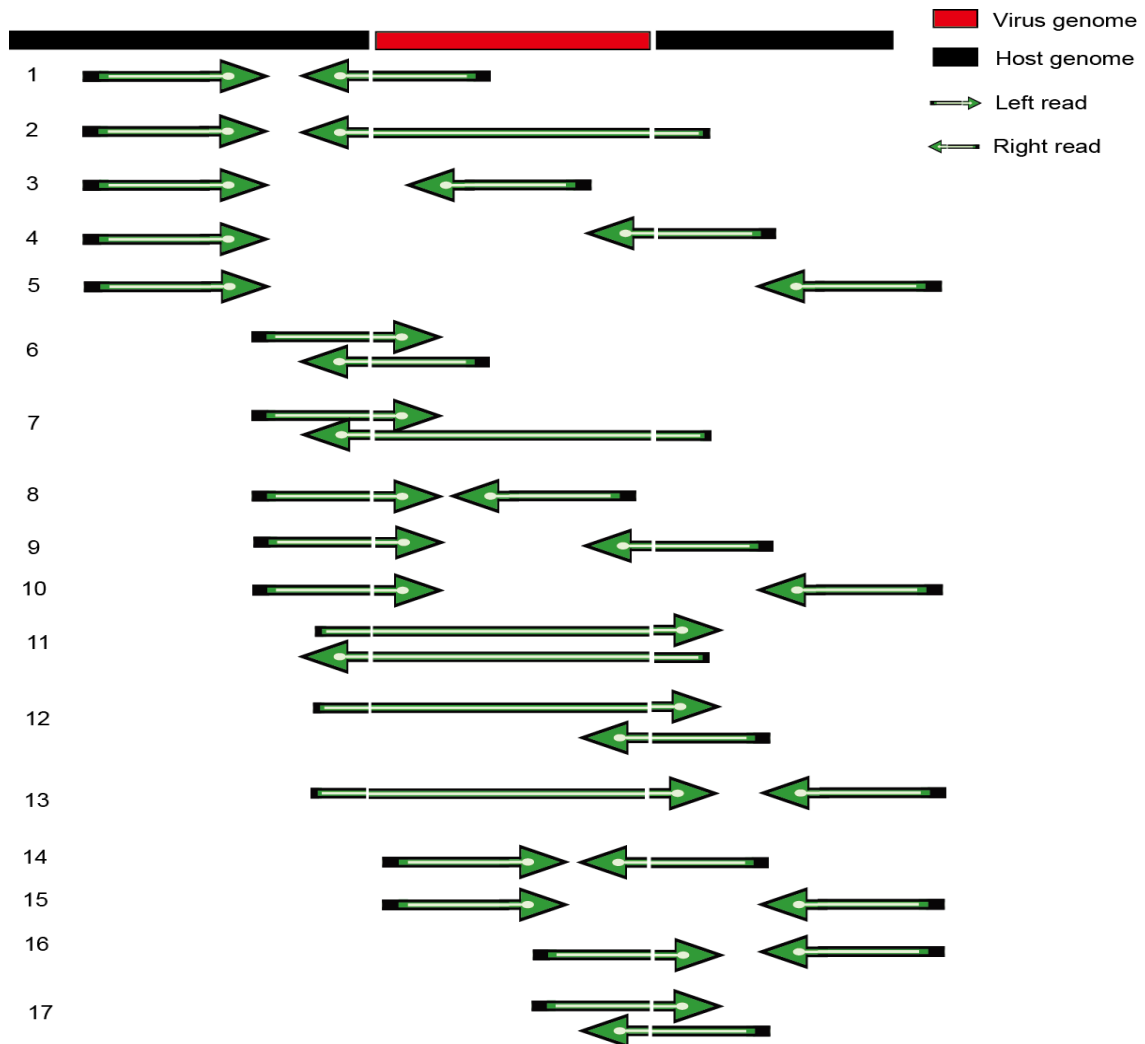

**Figure 1. Principal types of mapping reads around the viral integration site.**

Red bar, the virus sequence inserted in host genome; Green arrow, mapping reads with different directions; Breakpoints indicate logical division between host genome and virus, which are physically linked.

1  
2  
3  
4  
5

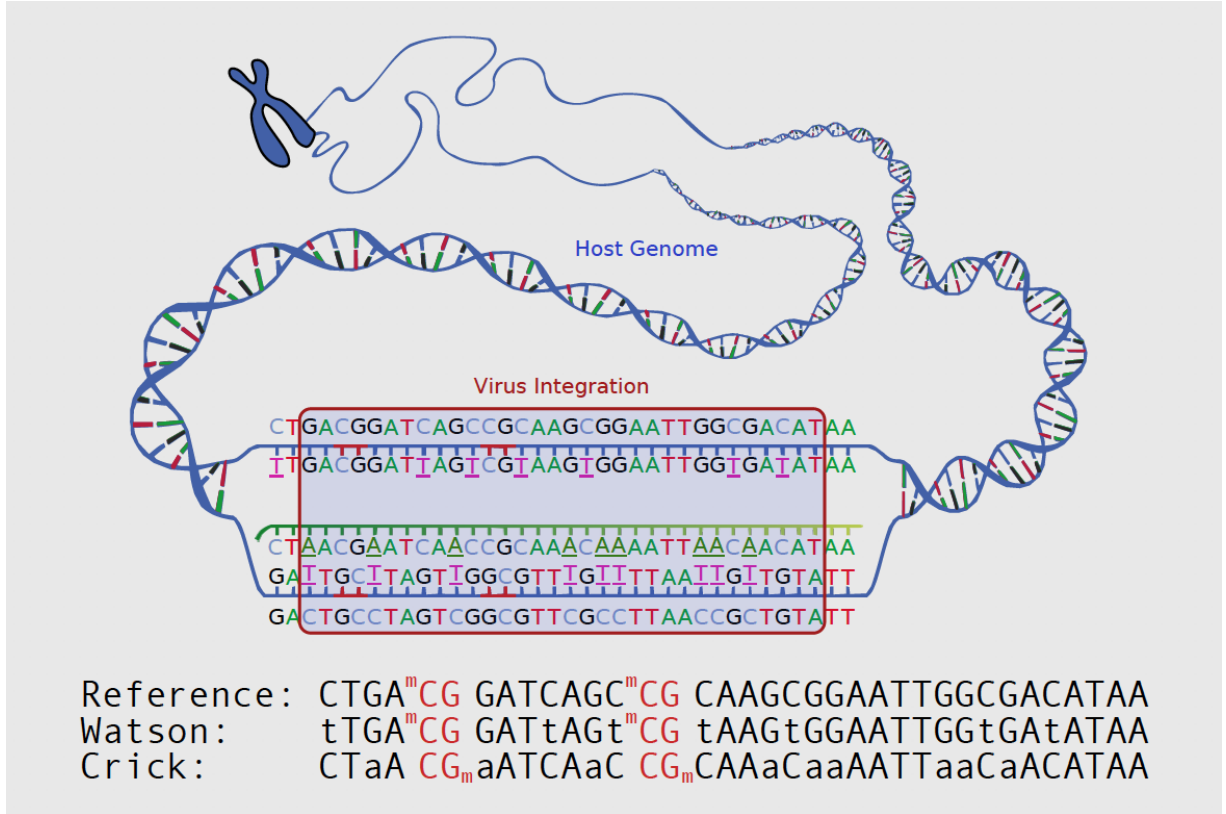

6  
7  
8  
9  
10  
11  
12  
13  
14  
15  
16  
17  
18  
19  
20  
21  
22  
23  
24  
25  
26  
27  
28  
29  
30  
31  
32  
33  
34  
35  
36  
37  
38  
39  
40  
41  
42  
43  
44  
45  
46  
47  
48  
49  
50  
51  
52  
53  
54  
55  
56  
57  
58  
59  
60  
61  
62  
63  
64  
65

**Figure 2. The illustration of restore algorithm restoring the bisulfite-altered sequence to the original.**

This is a typical alignment of BS reads to the virus integration sites. Methylation sites were showed as read bases. Bisulfite treated base may alter the original base from G to A, or C to T. Our restore algorithm was used to reveal the original sequence after BS data clustering. m indicated methylation-modified base. Low-case letter indicates the unmatched base to the reference.

1  
2  
3  
4  
5  
6  
7  
8  
9  
10  
11  
12  
13  
14  
15  
16  
17  
18  
19  
20  
21  
22  
23  
24  
25  
26  
27  
28  
29  
30  
31  
32  
33  
34  
35  
36  
37  
38  
39  
40  
41  
42  
43  
44  
45  
46  
47  
48  
49  
50  
51  
52  
53  
54  
55  
56  
57  
58  
59  
60  
61  
62  
63  
64  
65

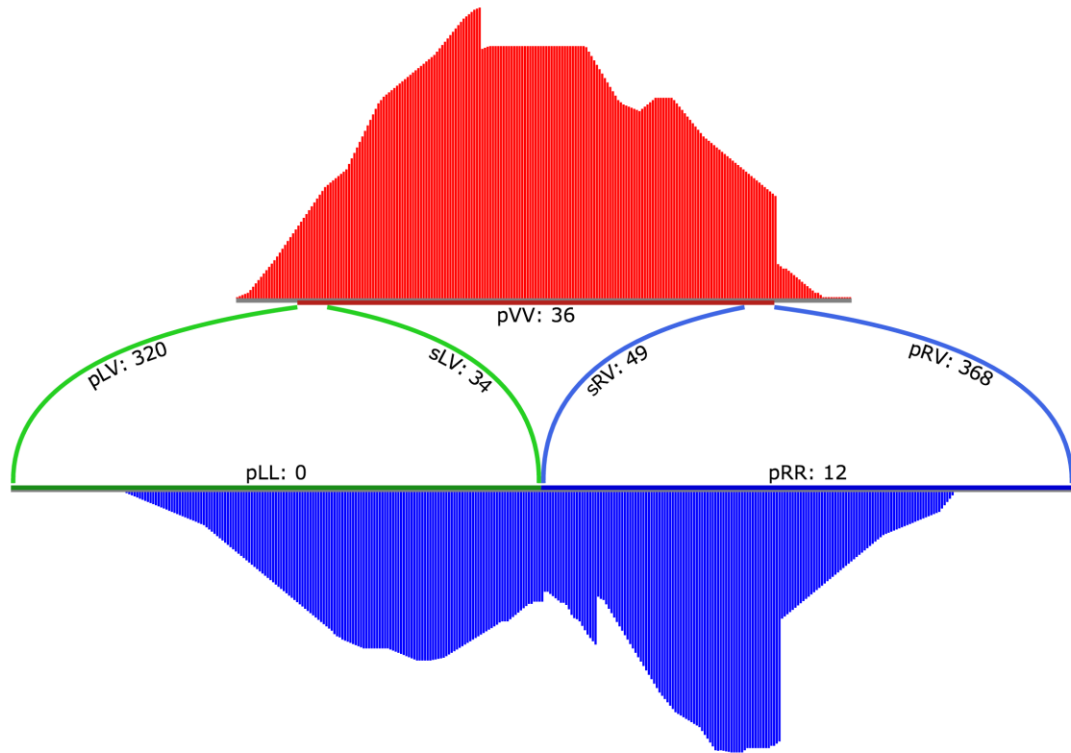

1  
2  
3  
4  
5  
6  
7  
8  
9

**Figure 3. A simulated model of viral integration cluster around breakpoints.**

Horizon Lines: Red, Inserted virus fragments (V); Green zone, 5' upstream of insertion (Left); Blue: 3' downstream of insertion (Right); Gray, DNA strands;  
Bars show the coverage depth on virus (red) and human genome (blue);  
Curves show count of pair-end relationship of reads among Left, Right and Virus part: pLL, L to L pair-end reads; pLV, L to V pair-end reads; sLV, single reads mapped on both L and V.



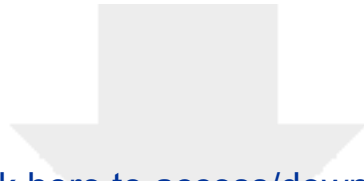

Click here to access/download  
**Supplementary Material**  
Supplementary-bsfinder-0210.docx

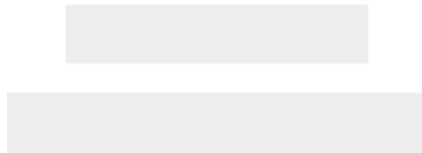

Supplement: gix123_giga-d-17-00032_original_submission.pdf [file gix123_giga-d-17-00032_original_submission.pdf]
