# Supplementary material for: BS-virus-finder: virus integration calling using bisulfite sequencing data
Source: PubMed Central journal article supplement (PMC5788064; doi:10.1093/gigascience/gix123), 2017-12-18
Supplement: gix123_giga-d-17-00032_revision_2.pdf [file gix123_giga-d-17-00032_revision_2.pdf]

|                                                      |                                                                                                                                                                                                                                                                                                                                                                                                                                                                                                                                                                                                                                                                                                                                                                                                                        |                   |
|------------------------------------------------------|------------------------------------------------------------------------------------------------------------------------------------------------------------------------------------------------------------------------------------------------------------------------------------------------------------------------------------------------------------------------------------------------------------------------------------------------------------------------------------------------------------------------------------------------------------------------------------------------------------------------------------------------------------------------------------------------------------------------------------------------------------------------------------------------------------------------|-------------------|
| <b>Manuscript Number:</b>                            | GIGA-D-17-00032R2                                                                                                                                                                                                                                                                                                                                                                                                                                                                                                                                                                                                                                                                                                                                                                                                      |                   |
| <b>Full Title:</b>                                   | BS-virus-finder: virus integration calling using bisulfite-sequencing data                                                                                                                                                                                                                                                                                                                                                                                                                                                                                                                                                                                                                                                                                                                                             |                   |
| <b>Article Type:</b>                                 | Technical Note                                                                                                                                                                                                                                                                                                                                                                                                                                                                                                                                                                                                                                                                                                                                                                                                         |                   |
| <b>Funding Information:</b>                          | Young Scientists Fund of the National Natural Science Foundation of China (81602477)                                                                                                                                                                                                                                                                                                                                                                                                                                                                                                                                                                                                                                                                                                                                   | Dr. Shengjie Gao  |
|                                                      | Shenzhen Municipal Government of China (ZDSYS201507301424148)                                                                                                                                                                                                                                                                                                                                                                                                                                                                                                                                                                                                                                                                                                                                                          | Prof. Shengbin Li |
| <b>Abstract:</b>                                     | <p>Background: DNA methylation plays a key role in regulating gene expression and carcinogenesis. Extant methylation bisulfite sequencing (BS) researches mainly focus on calling SNP, DMR, and ASM, instead of virus integration positions.</p> <p>Findings: We developed a new and easy-to-use software, named as BS-virus-finder (<a href="https://github.com/BioInfoTools/BSVF">https://github.com/BioInfoTools/BSVF</a>), to detect viral integration breakpoints in whole human genomes.</p> <p>Conclusions: BS-virus-finder demonstrates moderate sensitivity and specificity, and is useful to be applied in epigenetic researches and to reveal the relationship between viral integration and DNA methylation. BS-virus-finder is the first software to detect virus by using bisulfite sequencing data.</p> |                   |
| <b>Corresponding Author:</b>                         | Christian Pedersen<br><br>DENMARK                                                                                                                                                                                                                                                                                                                                                                                                                                                                                                                                                                                                                                                                                                                                                                                      |                   |
| <b>Corresponding Author Secondary Information:</b>   |                                                                                                                                                                                                                                                                                                                                                                                                                                                                                                                                                                                                                                                                                                                                                                                                                        |                   |
| <b>Corresponding Author's Institution:</b>           |                                                                                                                                                                                                                                                                                                                                                                                                                                                                                                                                                                                                                                                                                                                                                                                                                        |                   |
| <b>Corresponding Author's Secondary Institution:</b> |                                                                                                                                                                                                                                                                                                                                                                                                                                                                                                                                                                                                                                                                                                                                                                                                                        |                   |
| <b>First Author:</b>                                 | Shengjie Gao                                                                                                                                                                                                                                                                                                                                                                                                                                                                                                                                                                                                                                                                                                                                                                                                           |                   |
| <b>First Author Secondary Information:</b>           |                                                                                                                                                                                                                                                                                                                                                                                                                                                                                                                                                                                                                                                                                                                                                                                                                        |                   |
| <b>Order of Authors:</b>                             | Shengjie Gao                                                                                                                                                                                                                                                                                                                                                                                                                                                                                                                                                                                                                                                                                                                                                                                                           |                   |
|                                                      | Xuesong Hu                                                                                                                                                                                                                                                                                                                                                                                                                                                                                                                                                                                                                                                                                                                                                                                                             |                   |
|                                                      | Changduo Gao                                                                                                                                                                                                                                                                                                                                                                                                                                                                                                                                                                                                                                                                                                                                                                                                           |                   |
|                                                      | Kai Xiong                                                                                                                                                                                                                                                                                                                                                                                                                                                                                                                                                                                                                                                                                                                                                                                                              |                   |
|                                                      | Fengping Xu                                                                                                                                                                                                                                                                                                                                                                                                                                                                                                                                                                                                                                                                                                                                                                                                            |                   |
|                                                      | Xiao Zhao                                                                                                                                                                                                                                                                                                                                                                                                                                                                                                                                                                                                                                                                                                                                                                                                              |                   |
|                                                      | Haixiao Chen                                                                                                                                                                                                                                                                                                                                                                                                                                                                                                                                                                                                                                                                                                                                                                                                           |                   |
|                                                      | Shancen Zhao                                                                                                                                                                                                                                                                                                                                                                                                                                                                                                                                                                                                                                                                                                                                                                                                           |                   |
|                                                      | Mengyao Wang                                                                                                                                                                                                                                                                                                                                                                                                                                                                                                                                                                                                                                                                                                                                                                                                           |                   |
|                                                      | Dongke Fu                                                                                                                                                                                                                                                                                                                                                                                                                                                                                                                                                                                                                                                                                                                                                                                                              |                   |
|                                                      | Xiaohui Zhao                                                                                                                                                                                                                                                                                                                                                                                                                                                                                                                                                                                                                                                                                                                                                                                                           |                   |
|                                                      | Jie Bai                                                                                                                                                                                                                                                                                                                                                                                                                                                                                                                                                                                                                                                                                                                                                                                                                |                   |
|                                                      | Likai Mao                                                                                                                                                                                                                                                                                                                                                                                                                                                                                                                                                                                                                                                                                                                                                                                                              |                   |
|                                                      | Bo Li                                                                                                                                                                                                                                                                                                                                                                                                                                                                                                                                                                                                                                                                                                                                                                                                                  |                   |
| Song Wu                                              |                                                                                                                                                                                                                                                                                                                                                                                                                                                                                                                                                                                                                                                                                                                                                                                                                        |                   |

|                                                |                                                                                                                                                                                                                                                                                                                                                                                                                                                                                                                                                                                                                                                                                                                                                                                                                                                                                                                                                                                                                                                                                                                                                                                                                                                                                                                                                                                                                                                                                                                                                                                                                                                                                                                                                                                                                                                                                                                                                                                                                                                                                                                                                                                                                                                                                                                                                                                                                                                                                                                                                                                                                                                                                                                                                                                                                                                                                                                                                                                                                                                                                                                                                                                                                                                                                                                             |
|------------------------------------------------|-----------------------------------------------------------------------------------------------------------------------------------------------------------------------------------------------------------------------------------------------------------------------------------------------------------------------------------------------------------------------------------------------------------------------------------------------------------------------------------------------------------------------------------------------------------------------------------------------------------------------------------------------------------------------------------------------------------------------------------------------------------------------------------------------------------------------------------------------------------------------------------------------------------------------------------------------------------------------------------------------------------------------------------------------------------------------------------------------------------------------------------------------------------------------------------------------------------------------------------------------------------------------------------------------------------------------------------------------------------------------------------------------------------------------------------------------------------------------------------------------------------------------------------------------------------------------------------------------------------------------------------------------------------------------------------------------------------------------------------------------------------------------------------------------------------------------------------------------------------------------------------------------------------------------------------------------------------------------------------------------------------------------------------------------------------------------------------------------------------------------------------------------------------------------------------------------------------------------------------------------------------------------------------------------------------------------------------------------------------------------------------------------------------------------------------------------------------------------------------------------------------------------------------------------------------------------------------------------------------------------------------------------------------------------------------------------------------------------------------------------------------------------------------------------------------------------------------------------------------------------------------------------------------------------------------------------------------------------------------------------------------------------------------------------------------------------------------------------------------------------------------------------------------------------------------------------------------------------------------------------------------------------------------------------------------------------------|
|                                                | Jian Wang                                                                                                                                                                                                                                                                                                                                                                                                                                                                                                                                                                                                                                                                                                                                                                                                                                                                                                                                                                                                                                                                                                                                                                                                                                                                                                                                                                                                                                                                                                                                                                                                                                                                                                                                                                                                                                                                                                                                                                                                                                                                                                                                                                                                                                                                                                                                                                                                                                                                                                                                                                                                                                                                                                                                                                                                                                                                                                                                                                                                                                                                                                                                                                                                                                                                                                                   |
|                                                | Shengbin Li                                                                                                                                                                                                                                                                                                                                                                                                                                                                                                                                                                                                                                                                                                                                                                                                                                                                                                                                                                                                                                                                                                                                                                                                                                                                                                                                                                                                                                                                                                                                                                                                                                                                                                                                                                                                                                                                                                                                                                                                                                                                                                                                                                                                                                                                                                                                                                                                                                                                                                                                                                                                                                                                                                                                                                                                                                                                                                                                                                                                                                                                                                                                                                                                                                                                                                                 |
|                                                | Huanming Yang                                                                                                                                                                                                                                                                                                                                                                                                                                                                                                                                                                                                                                                                                                                                                                                                                                                                                                                                                                                                                                                                                                                                                                                                                                                                                                                                                                                                                                                                                                                                                                                                                                                                                                                                                                                                                                                                                                                                                                                                                                                                                                                                                                                                                                                                                                                                                                                                                                                                                                                                                                                                                                                                                                                                                                                                                                                                                                                                                                                                                                                                                                                                                                                                                                                                                                               |
|                                                | Lars Bolund                                                                                                                                                                                                                                                                                                                                                                                                                                                                                                                                                                                                                                                                                                                                                                                                                                                                                                                                                                                                                                                                                                                                                                                                                                                                                                                                                                                                                                                                                                                                                                                                                                                                                                                                                                                                                                                                                                                                                                                                                                                                                                                                                                                                                                                                                                                                                                                                                                                                                                                                                                                                                                                                                                                                                                                                                                                                                                                                                                                                                                                                                                                                                                                                                                                                                                                 |
|                                                | Christian Pedersen                                                                                                                                                                                                                                                                                                                                                                                                                                                                                                                                                                                                                                                                                                                                                                                                                                                                                                                                                                                                                                                                                                                                                                                                                                                                                                                                                                                                                                                                                                                                                                                                                                                                                                                                                                                                                                                                                                                                                                                                                                                                                                                                                                                                                                                                                                                                                                                                                                                                                                                                                                                                                                                                                                                                                                                                                                                                                                                                                                                                                                                                                                                                                                                                                                                                                                          |
| <b>Order of Authors Secondary Information:</b> |                                                                                                                                                                                                                                                                                                                                                                                                                                                                                                                                                                                                                                                                                                                                                                                                                                                                                                                                                                                                                                                                                                                                                                                                                                                                                                                                                                                                                                                                                                                                                                                                                                                                                                                                                                                                                                                                                                                                                                                                                                                                                                                                                                                                                                                                                                                                                                                                                                                                                                                                                                                                                                                                                                                                                                                                                                                                                                                                                                                                                                                                                                                                                                                                                                                                                                                             |
| <b>Response to Reviewers:</b>                  | <p>Reviewer reports:<br/> Reviewer #1: Re-review on manuscript<br/> BS-virus-finder: virus integration calling using bisulfite-sequencing data<br/> Shengjie Gao, Ph.D; Xuesong Hu; Changduo Gao; Kai Xiong; Fengping Xu; Xiao Zhao; Haixiao Chen; Shancen Zhao; Mengyao Wang; Dongke Fu; Xiaohui Zhao; Jie Bai; Bo Li; Song Wu; Shengbin Li; Huanming Yang; Lars Bolund; Christian Pedersen.<br/> by Lada A Koneva, PhD</p> <p>Introduction<br/> The reviewed manuscript (BS-virus-finder: virus integration calling using bisulfite-sequencing data) describes developed software to detect viral integration breakpoints in whole-genome bisulfite-sequencing data (WGBS).<br/> The manuscript was improved according to my suggested concerns and questions, but there are still some questions.</p> <p>Questions<br/> As a consequence of choosing HBV for simulation and PLC/PRF/5 hepatocellular carcinoma cell lines (which harboring HBV) as a real data, there is still unanswered my question about how this algorithm will work in case of HPV integration. There are about 170 types of HPV, with high commonality between different types, and about 15 types are carcinogenic. How authors suggest creating a "hybrid reference that contains both human genome and virus sequences" in case of HPV? Which viral types could be chosen for alignment of assembled clipping regions in case of HPV contamination? Probably this algorithm could not accurately predict which type(s) of HPV contaminates the sample. It would be useful if authors could provide their thoughts if this algorithm also will work in case of virus like HPV or this should be restricted to analysis of HBV integration only.</p> <p>Although most programs input only one virus sequence, BSVF users are allowed to set their own multiple virus sequences. For each custom virus genome, BSVF constructs a hybrid reference by combining the virus sequences and human reference. For viruses with large number of strains, such as HPV, to get more meaningful results, we suggest users select some representative sequences from highly similar (such as &gt;90% similarity) sequences.</p> <p>How many reads were simulated in each simulation scenario? Did the authors vary the sequencing depth in the simulations?</p> <p>We simulated all possible reads base by base with selected insert size in each scenario, and the number of reads in each scenario are not equal. The varied depth and the number of reads were listed for each scenario in updated Supplementary Table 6.</p> <p>Minor<br/> 1. Section "Description in silico and real data": authors mentioned that simulated reads were selected from chr 18 of GRCh38 and then next sentence "Input fragments were selected from chr 18 in the GRCh37 assembly (hg19) of the human genome". Please, correct this if it's your typo, or clarify why different versions of reference genome were used for simulation.<br/> All data used in the manuscript were based on simulation of chr1, although we have also simulated chr18. Thanks. We have revised the text.</p> <p>2. Also they are still using the word "stimulated" instead of "simulated". And in the section "Availability of supporting data" the chromosome 1 was mentioned as chosen</p> |

|                                                                                                                                                                                                                                                                                                                                                                                                                                                                                                                                     |                                                                                                                                                                                                                                                                                                                                                                                                                                                                                                                                                                                                                                                                                                                                                                                                                   |
|-------------------------------------------------------------------------------------------------------------------------------------------------------------------------------------------------------------------------------------------------------------------------------------------------------------------------------------------------------------------------------------------------------------------------------------------------------------------------------------------------------------------------------------|-------------------------------------------------------------------------------------------------------------------------------------------------------------------------------------------------------------------------------------------------------------------------------------------------------------------------------------------------------------------------------------------------------------------------------------------------------------------------------------------------------------------------------------------------------------------------------------------------------------------------------------------------------------------------------------------------------------------------------------------------------------------------------------------------------------------|
|                                                                                                                                                                                                                                                                                                                                                                                                                                                                                                                                     | <p>for simulation. Please correct it. Also typo on page 14-15: "We stimulated three kinds of reads, PE50, 90, and 50" should be 150.</p> <p>As the answer to the above question, all descriptions in the manuscript were revised to chr1. Thank you, we have also revised the typo.</p> <p>3. Legend to Figure 1: The sentence "Methylation sites were showed as read bases" do you mean "red" bases?<br/>Thank you for your comments, we revised the typo.</p> <p>4. The information for which virus was used for the simulation of the viral integration is mentioned only at the end of the manuscript (Availability of supporting data). Please provide this information in section "Description in silico and real data".<br/>Thank you for your comments, we revised the text based on your suggestion.</p> |
| <b>Additional Information:</b>                                                                                                                                                                                                                                                                                                                                                                                                                                                                                                      |                                                                                                                                                                                                                                                                                                                                                                                                                                                                                                                                                                                                                                                                                                                                                                                                                   |
| <b>Question</b>                                                                                                                                                                                                                                                                                                                                                                                                                                                                                                                     | <b>Response</b>                                                                                                                                                                                                                                                                                                                                                                                                                                                                                                                                                                                                                                                                                                                                                                                                   |
| Are you submitting this manuscript to a special series or article collection?                                                                                                                                                                                                                                                                                                                                                                                                                                                       | No                                                                                                                                                                                                                                                                                                                                                                                                                                                                                                                                                                                                                                                                                                                                                                                                                |
| <p><b>Experimental design and statistics</b></p> <p>Full details of the experimental design and statistical methods used should be given in the Methods section, as detailed in our <a href="#">Minimum Standards Reporting Checklist</a>. Information essential to interpreting the data presented should be made available in the figure legends.</p> <p>Have you included all the information requested in your manuscript?</p>                                                                                                  | Yes                                                                                                                                                                                                                                                                                                                                                                                                                                                                                                                                                                                                                                                                                                                                                                                                               |
| <p><b>Resources</b></p> <p>A description of all resources used, including antibodies, cell lines, animals and software tools, with enough information to allow them to be uniquely identified, should be included in the Methods section. Authors are strongly encouraged to cite <a href="#">Research Resource Identifiers</a> (RRIDs) for antibodies, model organisms and tools, where possible.</p> <p>Have you included the information requested as detailed in our <a href="#">Minimum Standards Reporting Checklist</a>?</p> | Yes                                                                                                                                                                                                                                                                                                                                                                                                                                                                                                                                                                                                                                                                                                                                                                                                               |
| <p><b>Availability of data and materials</b></p> <p>All datasets and code on which the conclusions of the paper rely must be either included in your submission or deposited in <a href="#">publicly available repositories</a> (where available and ethically appropriate), referencing such data using</p>                                                                                                                                                                                                                        | Yes                                                                                                                                                                                                                                                                                                                                                                                                                                                                                                                                                                                                                                                                                                                                                                                                               |

a unique identifier in the references and in the "Availability of Data and Materials" section of your manuscript.

Have you have met the above requirement as detailed in our [Minimum Standards Reporting Checklist?](#)

# BS-virus-finder: virus integration calling using bisulfite-sequencing data

Shengjie Gao<sup>1,2,3,7,8,9\*</sup>, Xuesong Hu<sup>2,3\*</sup>, Fengping Xu<sup>3,10,13\*</sup>, Changduo Gao<sup>4</sup>, Kai Xiong<sup>5</sup>, Xiao Zhao<sup>2,11</sup>, Haixiao Chen<sup>3,13</sup>, Shancen Zhao<sup>3,7</sup>, Mengyao Wang<sup>3</sup>, Dongke Fu<sup>2</sup>, Xiaohui Zhao<sup>6</sup>, Jie Bai<sup>3</sup>, Likai Mao<sup>3</sup>, Bo Li<sup>2,3</sup>, Song Wu<sup>8</sup>, Jian Wang<sup>3</sup>, Shengbin Li<sup>2,12</sup>, Huangming Yang<sup>3, 7,11</sup>, Lars Bolund<sup>9#</sup>, Christian N. S. Pedersen<sup>1#</sup>

<sup>1</sup> Bioinformatics Research Centre, Aarhus University, Aarhus, Denmark

<sup>2</sup> BGI-Forensic, Shenzhen 518083, China

<sup>3</sup> BGI-Shenzhen, Shenzhen 518083, China

<sup>4</sup> College of Computer Science & Technology, Qingdao University, Qingdao 266071, China

<sup>5</sup> Department of Veterinary Clinical and Animal Sciences, University of Copenhagen, Copenhagen, Denmark

<sup>6</sup> College of Mathematics & Statistics, Changsha University of Science & Technology, Changsha 410114, China

<sup>7</sup> James D. Watson Institute of Genome Sciences, Hangzhou 310058, China

<sup>8</sup> The Affiliated Luohu Hospital of Shenzhen University, Shenzhen University, Shenzhen 518000, China.

<sup>9</sup> Department of Biomedicine, Aarhus University, Aarhus, Denmark

<sup>10</sup> Department of Biology, University of Copenhagen, Copenhagen, Denmark

<sup>11</sup> BGI Education Center, University of Chinese Academy of Sciences.

<sup>12</sup> Shenzhen Key Laboratory of Forensics, BGI-Shenzhen, Shenzhen 518083, China.

<sup>13</sup> China National GeneBank, BGI-Shenzhen, Shenzhen 518120, China

\* These authors contributed equally to this work

# These authors equally directed the work

1  
2  
3  
4  
5  
6  
7  
8  
9  
10  
11  
12  
13  
14  
15  
16  
17  
18  
19  
20  
21  
22  
23  
24  
25  
26  
27  
28  
29  
30  
31  
32  
33  
34  
35  
36  
37  
38  
39  
40  
41  
42  
43  
44  
45  
46  
47  
48  
49  
50  
51  
52  
53  
54  
55  
56  
57  
58  
59  
60  
61  
62  
63  
64  
65

## 2 **Abstract**

3 **Background:** DNA methylation plays a key role in regulation of gene expression and  
4 carcinogenesis. Bisulfite sequencing studies mainly focus on calling SNP, DMR, and ASM.  
5 Until now, only a few software tools focus on virus integration using bisulfite sequencing  
6 data.

7 **Findings:** We have developed a new and easy-to-use software tool, named as  
8 BS-virus-finder (BSVF, RRID: SCR\_015727), to detect viral integration breakpoints in whole  
9 human genomes. The tool is hosted at <https://github.com/BGI-SZ/BSVF>.

10 **Conclusions:** BS-virus-finder demonstrates high sensitivity and specificity, and it is useful  
11 in epigenetic studies and to reveal the relationship between viral integration and DNA  
12 methylation. BS-virus-finder is the first software tool to detect virus by using bisulfite  
13 sequencing data.

14 **Keyword:** Virus integration, Bisulfite sequencing, Carcinogenesis

1

## 2 **Findings**

### 3 **Introduction**

4 DNA methylation plays crucial roles in many areas including development [1, 2] and X  
5 chromosome inactivation [3] by regulating genetic imprinting and epigenetic modification  
6 without altering DNA sequences. Previous studies have showed strong association of DNA  
7 methylation with cancer. The methylation status altering related carcinogenesis [4], cancer  
8 recurrence [5] and metastasis [6] has already been revealed by emerging bisulfite sequencing  
9 (BS) technology. BS technology can investigate DNA methylation changes with single-base  
10 accuracy. Treatment of DNA with bisulfite converts unmethylated cytosine residues to uracil,  
11 but leaves 5-methylcytosine residues unmodified [7]. Thus, bisulfite treatment introduces  
12 specific changes in the DNA sequence that depend on the methylation status of individual  
13 cytosine residues, yielding single-nucleotide resolution information about the methylation  
14 status of a segment of DNA (Figure 1). Various analyses can be performed on the altered  
15 sequences to retrieve this information. BS technology can reveal differences between  
16 cytosines and thymidine and sequence change resulting from bisulfite conversion. For the  
17 bases without methylation, all C will change to T on both strands. After directional library  
18 preparation, we have two different conversions: The Watson, and the Crick strand, as shown  
19 in Figure 1. On the Watson strand, methylated C remains C, and unmethylated C changes to T.  
20 On the Crick strand, the reverse complement happens, i.e. methylated C remains C but in  
21 sequenced reads it is reverse complemented to G, and unmethylated C changes to T, leading to

1 the reverse complement base A in sequenced reads. Since base C can either be methylated or  
2 unmethylated, we can use IUPAC nucleotide code “Y” and “R” to represent C/T and G/A  
3 respectively. So, after bisulfite treatment, base C changes to Y on the Watson strand, and base  
4 G changes to R on the Crick strand.

5  
6 Whole-genome based bisulfite sequencing (WGBS) has been developed to detect DNA  
7 methylation. Recent clinical studies showed that DNA methylation is associated with viral  
8 integration [8, 9]. Whole-genome BS (WGBS) data can be analyzed to investigate the  
9 sequence mapping and alignment via BSMAP [10], Bismark [11] and bwa-meth [12], to detect  
10 DMR (different methylation regions) via software QDMR [13], DMAP [14] and SMAP [15],  
11 to identify SNP (single nucleotide polymorphism) via software BS-SNPer [16] and Bis-SNP  
12 [17], to find ASM (allele-specific DNA methylation) via SMAP [15], Methy-Pipe [18].  
13 However, none of them can be used for virus integration loci calling, and no software tool is  
14 currently available to detect virus integration loci by analyzing BS data. Therefore, we have  
15 developed a software tool to detect the virus integration loci by genome-wide BS analysis.

#### 16 **Description in silico and real data.**

17 Different types of PE (paired-end) reads (50bp, 90bp, 150bp) that include 700 breakpoints in  
18 chromosome 1 (chr 1) of GRCh38 were simulated in our study. Input fragments of 50 to 400  
19 bp were randomly selected from chr 1 in the GRCh38 assembly of the human genome. HBV  
20 genome (GenBank: X04615.1) was used in our simulation. Its integration length was between  
21 45 bp and 180 bp. We cut HBV containing segments with given pair-end insert size at all



1 possible positions on every integration events. After alignment, mapping accuracy of each of  
2 the 17 different types of reads mapping was calculated (Figure 2). Mapping accuracy varied  
3 among the 17 types of read mappings in our simulation (Figure S1, S2, S3). In summary, the  
4 accuracies of several kinds of the reads mappings were low (Table S1, S2, S3), which may  
5 raise false-negative rate. Generally, however, bwa-meth [12] performed very well.

6  
7 Bisulfite sequencing is a marvelous and sophisticated technique to study DNA cytosine  
8 methylation. Bisulfite treatment followed by PCR amplification specifically converts  
9 unmethylated cytosine to thymine. By cooperating with next generation sequencing  
10 technology, it is able to detect the methylation status of every cytosine in the whole genome.  
11 Moreover, longer reads make it possible to achieve higher accuracy. Besides simulated data,  
12 the PLC/PRF/5 hepatocellular carcinoma cell lines were from American Type Culture  
13 Collection (ATCC, Manassas, VA) were cultured as previously described [19]. The cell line  
14 was validated by STR makers (Figure S4). We performed WGS and WGBS sequencing of this  
15 cell line, the result is showed in Table S4. Table 1 shows the analysis result for WGS data,  
16 which was compared with the output results analyzed by Vy-per [20], virus-clip[21] and Virus  
17 Finder2 [22].

## 18 **Methods**

### 19 *Sample preparation*

20 PLC/PRF/5 hepatocellular carcinoma cell line was obtained from American Type Culture  
21 Collection (ATCC, Manassas, VA) and were cultured as previously described [19] , which was

1 also validated by STR makers (Figure S4). Then totally 15 µg DNA was extracted to perform  
2 WGS and WGBS sequencing. Sample concentration was detected by fluorometer  
3 (QubitFluorometer, Invitrogen). Sample integrity and purification was determined by Agarose  
4 Gel Electrophoresis.

#### 5 *Whole genome sequencing*

6 About 1.5 µg gDNA was sonicated to 100-300 bp fragment genome DNA by Sonication  
7 (Covaris), purified with QIAquick PCR Purification Kit (Qiagen). Adapter ligation and target  
8 insert size fragments recovering, and quantifying library by real-time quantitative PCR  
9 (QPCR) (TaqMan Probe) was then performed. The qualified library was sequenced on an  
10 Illumina Hiseq X Ten platform and 150bp paired-end reads were obtained. Totally, around 90  
11 G clean data were generated.

#### 12 *Whole genome bisulfite sequencing*

13 About 3 µg gDNA were sonicated to 100-300 bp by Sonication (Covaris), purified with  
14 MiniElute PCR Purification Kit (QIAGEN). A single 'A' nucleotide was added to the 3' ends  
15 of the blunt fragments. Methylated adapters were then purified and added to the 5' and 3' ends  
16 of each strand in the genomic fragment. Sizes 300-400bp were selected. DNA was then  
17 purified with QIAquick Gel Extraction kit (QIAGEN) and bisulfite treated with  
18 Methylation-Gold kit (ZYMO). Finally PCR was conducted and sizes 350-400bp were  
19 selected and purified with QIAquick Gel Extraction kit (QIAGEN). Qualified library was  
20 amplified on cBot to generate the cluster on the flowcells (TruSeq PE Cluster Kit

1 V3-cBot-HS, Illumina). The flowcells were sequenced for 150 bp pair end reads on HiSeq X  
2  
3  
4 Ten platform and more than 90G clean data were generated.

### 5 6 7 3 *Data analysis*

8  
9  
10 4 The reads coverage situation for one integration is shown in Figure 3. Four steps were  
11  
12  
13 5 implemented to detect virus integration:

#### 14 15 16 6 1. Alignment

17  
18  
19 7 We use bwa-meth [12] to align bisulfite treated sequencing reads to a hybrid reference that  
20  
21  
22 8 contains both human genome and virus sequences. For chimeric reads from the junction parts,  
23  
24  
25 9 BWA-MEM [23] will align it to one organism and mark the unmapped part as soft clipping,  
26  
27  
28 10 which is in fact from the other organism. This enables us to find breakpoints directly from the  
29  
30  
31 11 alignment.

#### 32 33 34 12 2. Clustering

35  
36 13 After alignment, the result was filtered. We select read pairs with one read match by the  
37  
38  
39 14 following criterion: the Phred-scaled mapping quality is bigger than 30 ( $\geq 30$ ), and at least  
40  
41  
42 15 one soft clipping is longer than 5 bp ( $\geq 5$ ). The mapped parts of reads, which is marked as  
43  
44  
45 16 “M” by its CIGAR string, cover the human reference genome. For paired reads, we also add  
46  
47  
48 17 the gap between two mapped reads to their covered region, making read 1 and read 2 be  
49  
50  
51 18 continuous covered on human reference. Each continuous region with at least 1 bp overlap are  
52  
53  
54 19 defined as a cluster. All reads involved are selected to form the cluster. The remaining soft  
55  
56  
57 20 clippings are viral junction candidates. Read pairs with one read mapped on virus also indicate  
58  
59  
60 21 potential virus junction between the read pair.  
61  
62  
63  
64  
65

1 3. Assembling

2 Within one cluster, all soft clipping start sites are collected. The position with the most  
3 abundance of start sites is identified as the most likely candidate breakpoint. All clipping  
4 sequences in the cluster are extracted and aligned together. A restore algorithm was used to  
5 calculate the most possible base in each position based on the aligned bases and its sequencing  
6 quality. The algorithm is based on a Bayesian model, where we compute the posteriori  
7 probability estimation for A, C, G, T as:

$$\begin{aligned}
 P(T_i | D) &= \frac{P(T_{Wi})P(D | T_{Wi})}{\sum_{x=1}^S P(T_{Wx})P(D | T_{Wx})} \times \frac{P(T_{Ci})P(D | T_{Ci})}{\sum_{x=1}^S P(T_{Cx})P(D | T_{Cx})} \\
 &= C_0 \times P(D | T_{Wi}) \times P(D | T_{Ci}) \\
 C_0 &= \frac{P(T_{Wi})}{\sum_{x=1}^S P(T_{Wx})P(D | T_{Wx})} \times \frac{P(T_{Ci})}{\sum_{x=1}^S P(T_{Cx})P(D | T_{Cx})}
 \end{aligned} \tag{1}$$

8 Here, D is the observation of the NGS reads on given position. P(T<sub>i</sub>|D) is the likelihood  
9 component, which can be interpreted as the probability of observing D when the true genotype  
10 is T<sub>i</sub>. D<sub>W</sub> be a realization (or observation) of the NGS reads in the Watson strand. D<sub>C</sub> be a  
11 realization (or observation) of the NGS reads in Crick strand. P(T<sub>Wi</sub>|D) is the likelihood  
12 component, which can be interpreted as the probability of observing D when the true genotype  
13 is T<sub>Wi</sub>. P(T<sub>Ci</sub>|D) is the likelihood component, which can be interpreted as the probability of  
14 observing D when the true genotype is T<sub>Ci</sub>. At each virus location, prior probability P(T<sub>i</sub>) of  
15 each genotype T<sub>i</sub> was set according to the Table S5. The likelihood P(D|T<sub>i</sub>) for the assumed  
16 genotype T<sub>i</sub> was calculated from the observed allele types in the sequencing reads in formula  
17 2. Thus, on the Watson strand it is P(D<sub>W</sub>|T<sub>i</sub>), on the Crick strand it is P(D<sub>C</sub>|T<sub>i</sub>). We defined the  
18 likelihood of observing allele d<sub>k</sub> in a read for a possible haploid genotype T as P(d<sub>k</sub>|T), and on  
19

1 the Watson strand it is  $P(d_{wk}|T)$ , and on the Crick strand it is  $P(d_{ck}|T)$ . So, for a set of  $n$   
 2 observed alleles at a locus,  $D = \{d_1, d_2, \dots, d_n\}$  on each strand, these probabilities are  
 3 computed as shown by formula 3 & 4, where  $Q$  stands for the base quality from the fastaq file.

$$P(D_w | T_i) = \prod_{k=1}^m P(d_{wk} | T), P(D_c | T_i) = \prod_{k=1}^n P(d_{ck} | T). \quad (2)$$

$$P(d_{wk} | T) = \begin{cases} 1 - 10^{-\frac{Q}{10}} & (T \in \{A, C, G\}) \\ \frac{1 - 10^{-\frac{Q}{10}}}{2} & (T \in \{T\}) \end{cases}, \quad (3)$$

$$P(d_{ck} | T) = \begin{cases} 1 - 10^{-\frac{Q}{10}} & (T \in \{C, G, T\}) \\ \frac{1 - 10^{-\frac{Q}{10}}}{2} & (T \in \{A\}) \end{cases}. \quad (4)$$

6 We used “Y” and “R” to represent C/T and G/A respectively (IUPAC nucleotide code). If a  
 7 region is covered by both the Watson strand and the Crick strand, we were able to deduce the  
 8 original base from Y or R by calculation.

#### 9 4. Detection of viral integrations

10 The assembled clipping regions above were mapped to the given virus reference sequence  
 11 with a Smith-Waterman local alignment tool from EMBOSS package [24], which support  
 12 IUPAC DNA codes Y and R. Virus fragment location is extracted from the alignment results.

## 13 Discussion

14 In summary, we have implemented the first software tool to detect virus integration using BS  
 15 data. Our software is based on bwa-meth, and by assembling and aligning soft-clip regions, it  
 16 can find the virus breakpoints. However, accuracy of reads surrounding the breakpoints needs  
 17 to be further improved. Virus usually integrates into regions that are homologous to both  
 18 human and virus (micro-homologous) [25]. Therefore, we consider the breakpoints predicted  
 19 by our software tool that are within 10 bp of a real breakpoint as being correctly identified

(Figure S2). With this definition, the accuracy of our predicted breakpoints can reach over 70%. Our results will be useful for analyzing BS data and related applications. Some of the results come with only location on human genome, and has the virus location missing. This may be due to the shortage of virus fragments. We simulated three kinds of reads, PE50, 90, and 150 with various lengths, and further simulated virus-inserted fragment with different length as well (Table S6), thus all cases described in Figure 2 are mimicked here. All simulation sampled all possible reads, base by base with fixed insert size. As the result in Table S6 showed, the longer the reads, the more accurate the prediction can be achieved. In particular, for read lengths around 50 bp, BS-virus-finder is capable to find the virus integration with an accuracy of more than 70%; for the read lengths between 90bp and 150bp, BS-virus-finder is capable to find the virus integration with an accuracy of more than 90%. Besides simulated data, we have performed WGS and WGBS sequencing of the PLC/PRF/5 hepatocellular carcinoma cell line (Table S4). As the results showed, when the length of input is larger than 150bp, the analysis result of WGBS is similar to the one of WGS. Additionally, BS-virus-finder is able to find breakpoints in 8 out of 9 regions which are identified by FISH [8]. Based on these experimental results, we believe that BS-virus-finder is a powerful software tool to analyze virus-integration using BS data.

## Availability and requirements

Project Name: BS-virus-finder: virus integration calling using bisulfite-sequencing data

Project home page: <https://github.com/BGI-SZ/BSVF> [26]

Operating system: Linux

1 Programming language: Perl, Python, C

2 License: LGPL v3

3

#### 4 **Availability of supporting data**

5 Data used in this paper is simulated based on random insertion of HBV sequence to human  
6 chromosome 1 sequence. A Perl script named “simVirusInserts.pl” is included, and our  
7 simulation schema is coded within. We have run the simulation several times and the result  
8 shows no significant difference. The PLC/PRF/5 hepatocellular carcinoma cell lines were  
9 from American Type Culture Collection (ATCC, Manassas, VA) and sequenced by HiSeq X  
10 Ten System from Novogene company. WGS and WGBA data have been submitted to NCBI  
11 SRA project PRJNA400455.

12

#### 13 **Competing interests**

14 The authors declare that they have no competing interests.

15

#### 16 **Authors' contributions**

17 CP, LB and HY conceptualized the project. SG, XH, SL and JW designed BSVF and  
18 developed its accompanying utilities. SG, XH, CG, XZ, MW and SZ developed the protocol.  
19 FX, DF, HC and JB conducted experiment. SG, XH, BL and SW undertook the analysis. KX,  
20 LM, SG, XH, LB and CP wrote and approved the final version of the manuscript. All authors  
21 read and approved the final manuscript.

22

#### 23 **Acknowledgements**

24 We appreciate the supporting of Xiaolin Liang and Hengtong Li in College of Mathematics &

1  
2  
3  
4  
5  
6  
7  
8  
9  
10  
11  
12  
13  
14  
15  
16  
17  
18  
19  
20  
21  
22  
23  
24  
25  
26  
27  
28  
29  
30  
31  
32  
33  
34  
35  
36  
37  
38  
39  
40  
41  
42  
43  
44  
45  
46  
47  
48  
49  
50  
51  
52  
53  
54  
55  
56  
57  
58  
59  
60  
61  
62  
63  
64  
65

1 Statistics, Changsha University of Science & Technology, for their contributing advice to our  
2 research. This work was funded by the National Natural Science Foundation of China  
3 (81602477) and Shenzhen Municipal Government of China (ZDSYS201507301424148).

## 4 5 **References**

- 6 1. Wang Y, Shang Y: Epigenetic control of epithelial-to-mesenchymal transition and  
7 cancer metastasis. *Experimental cell research* 2013, 319(2):160-169.
- 8 2. O'Doherty AM, Magee DA, O'Shea LC, Forde N, Beltman ME, Mamo S, Fair T: DNA  
9 methylation dynamics at imprinted genes during bovine pre-implantation embryo  
10 development. *BMC developmental biology* 2015, 15:13.
- 11 3. Cotton AM, Price EM, Jones MJ, Balaton BP, Kobor MS, Brown CJ: Landscape of DNA  
12 methylation on the X chromosome reflects CpG density, functional chromatin state  
13 and X-chromosome inactivation. *Human molecular genetics* 2015, 24(6):1528-1539.
- 14 4. Kamdar SN, Ho LT, Kron KJ, Isserlin R, van der Kwast T, Zlotta AR, Fleshner NE, Bader G,  
15 Bapat B: Dynamic interplay between locus-specific DNA methylation and  
16 hydroxymethylation regulates distinct biological pathways in prostate carcinogenesis.  
17 *Clinical epigenetics* 2016, 8:32.
- 18 5. Haldrup C, Mundbjerg K, Vestergaard EM, Lamy P, Wild P, Schulz WA, Arsov C,  
19 Visakorpi T, Borre M, Hoyer S et al: DNA methylation signatures for prediction of  
20 biochemical recurrence after radical prostatectomy of clinically localized prostate  
21 cancer. *Journal of clinical oncology : official journal of the American Society of  
22 Clinical Oncology* 2013, 31(26):3250-3258.
- 23 6. Kim JH, Dhanasekaran SM, Prensner JR, Cao X, Robinson D, Kalyana-Sundaram S,  
24 Huang C, Shankar S, Jing X, Iyer M et al: Deep sequencing reveals distinct patterns of  
25 DNA methylation in prostate cancer. *Genome research* 2011, 21(7):1028-1041.
- 26 7. Darst RP, Pardo CE, Ai L, Brown KD, Klädde MP: Bisulfite sequencing of DNA. *Current  
27 protocols in molecular biology / edited by Frederick M Ausubel [et al]* 2010,  
28 Chapter 7:Unit 7 9 1-17.
- 29 8. Watanabe Y, Yamamoto H, Oikawa R, Toyota M, Yamamoto M, Kokudo N, Tanaka S,  
30 Arii S, Yotsuyanagi H, Koike K et al: DNA methylation at hepatitis B viral integrants is  
31 associated with methylation at flanking human genomic sequences. *Genome research*  
32 2015, 25(3):328-337.
- 33 9. Lillsunde Larsson G, Helenius G, Sorbe B, Karlsson MG: Viral load, integration and  
34 methylation of E2BS3 and 4 in human papilloma virus (HPV) 16-positive vaginal and  
35 vulvar carcinomas. *PLoS one* 2014, 9(11):e112839.
- 36 10. Xi Y, Li W: BSMAP: whole genome bisulfite sequence MAPping program. *BMC  
37 bioinformatics* 2009, 10:232.
- 38 11. Krueger F, Andrews SR: Bismark: a flexible aligner and methylation caller for



1 Bisulfite-Seq applications. *Bioinformatics* 2011, 27(11):1571-1572.

2 12. Pedersen BS EK, De S, Yang IV, Schwartz DA: Fast and accurate alignment of long  
3 bisulfite-seq reads. eprint arXiv 2014.

4 13. Zhang Y, Liu H, Lv J, Xiao X, Zhu J, Liu X, Su J, Li X, Wu Q, Wang F et al: QDMR: a  
5 quantitative method for identification of differentially methylated regions by entropy.  
6 *Nucleic acids research* 2011, 39(9):e58.

7 14. Stockwell PA, Chatterjee A, Rodger EJ, Morison IM: DMAP: differential methylation  
8 analysis package for RRBS and WGBS data. *Bioinformatics* 2014.

9 15. Gao S, Zou D, Mao L, Zhou Q, Jia W, Huang Y, Zhao S, Chen G, Wu S, Li D et al: SMAP: a  
10 streamlined methylation analysis pipeline for bisulfite sequencing. *GigaScience* 2015,  
11 4:29.

12 16. Gao S, Zou D, Mao L, Liu H, Song P, Chen Y, Zhao S, Gao C, Li X, Gao Z et al: BS-SNPer:  
13 SNP calling in bisulfite-seq data. *Bioinformatics* 2015, 31(24):4006-4008.

14 17. Liu Y, Siegmund KD, Laird PW, Berman BP: Bis-SNP: Combined DNA methylation and  
15 SNP calling for Bisulfite-seq data. *Genome biology* 2012, 13(7):R61.

16 18. Jiang P, Sun K, Lun FM, Guo AM, Wang H, Chan KC, Chiu RW, Lo YM, Sun H:  
17 Methy-Pipe: an integrated bioinformatics pipeline for whole genome bisulfite  
18 sequencing data analysis. *PLoS one* 2014, 9(6):e100360.

19 19. Carr BI, Cavallini A, Lippolis C, D'Alessandro R, Messa C, Refolo MG, Tafaro A:  
20 Fluoro-Sorafenib (Regorafenib) effects on hepatoma cells: growth inhibition,  
21 quiescence, and recovery. *J Cell Physiol* 2013, 228(2):292-297.

22 20. Forster M, Szymczak S, Ellinghaus D, Hemmrich G, Ruhlemann M, Kraemer L, Mucha  
23 S, Wienbrandt L, Stanulla M, Group UFOSCwI-BS et al: Vy-PER: eliminating false  
24 positive detection of virus integration events in next generation sequencing data. *Sci*  
25 *Rep* 2015, 5:11534.

26 21. Ho DW, Sze KM, Ng IO: Virus-Clip: a fast and memory-efficient viral integration site  
27 detection tool at single-base resolution with annotation capability. *Oncotarget* 2015,  
28 6(25):20959-20963.

29 22. Wang Q, Jia P, Zhao Z: VERSE: a novel approach to detect virus integration in host  
30 genomes through reference genome customization. *Genome Med* 2015, 7(1):2.

31 23. Li H: Aligning sequence reads, clone sequences and assembly contigs with BWA-MEM.  
32 eprint arXiv 2013:3.

33 24. Rice P, Longden I, Bleasby A: EMBOSS: the European Molecular Biology Open Software  
34 Suite. *Trends in genetics : TIG* 2000, 16(6):276-277.

35 25. Hu Z, Zhu D, Wang W, Li W, Jia W, Zeng X, Ding W, Yu L, Wang X, Wang L et al:  
36 Genome-wide profiling of HPV integration in cervical cancer identifies clustered  
37 genomic hot spots and a potential microhomology-mediated integration mechanism.  
38 *Nature genetics* 2015, 47(2):158-163.

39 26. Bisulfite Sequencing Virus integration Finder. <https://github.com/BGI-SZ/BSVF>.  
40 Accessed 16 Oct 2017.

1  
2  
3  
4  
5  
6  
7  
8  
9  
10  
11  
12  
13  
14  
15  
16  
17  
18  
19  
20  
21  
22  
23  
24  
25  
26  
27  
28  
29  
30  
31  
32  
33  
34  
35  
36  
37  
38  
39  
40  
41  
42  
43  
44  
45  
46  
47  
48  
49  
50  
51  
52  
53  
54  
55  
56  
57  
58  
59  
60  
61  
62  
63  
64  
65

**Table 1. The comparison of BS-virus-finder with other software using real data.**

| Chr    | BSVF      |      |      | Vy-per    |      |      | virus-clip |      |      | Virus Finder2 |      |      |
|--------|-----------|------|------|-----------|------|------|------------|------|------|---------------|------|------|
|        | HB        | VB   | VE   | HB        | VB   | VE   | HB         | VB   | VE   | HB            | VB   | VE   |
| chr1   | 143272758 | 2945 | 3102 |           |      |      |            |      |      |               |      |      |
| chr2   | -         |      |      | -         |      |      | 52018758   | 207  | 281  |               |      |      |
| chr3*  | 131451702 | 1212 | 1322 | -         |      |      | 131451701  | 1282 | 1403 | 131451701     | 1405 |      |
| chr3*  | 131453124 | 1416 | 1515 | -         |      |      | 131453353  | 1416 | 1538 |               |      |      |
| chr4*  | 180586417 | 136  | 378  |           |      |      |            |      |      | 180586416     | 59   |      |
| chr4*  | 180587608 | 394  | 594  | 180586607 | 167  | 231  | 180587608  | 500  | 632  | 180587607     | 634  |      |
| chr5*  | 1297478   | 1174 | 1315 | -         |      |      | 1297478    | 1241 | 1385 | 1297477       | 1388 |      |
| chr7   | 110894616 | 2739 | 2748 |           |      |      |            |      |      |               |      |      |
| chr8*  | 35446380  | 2389 | 2459 | 35446214  | 2402 | 2455 | 35446601   | 2390 | 2519 | 35446392      | 2396 | 2608 |
| chr8   | -         |      |      |           |      |      | 106944290  | 698  | 1077 |               |      |      |
| chr11* | 65040943  | 2631 | 2767 | -         |      |      | -          |      |      | 65040964      | 2532 |      |
| chr12* | 109573899 | 721  | 815  | 109573677 | 668  | 734  | 109573899  | 705  | 815  |               |      |      |
| chr13  | 33088123  | 1521 | 1603 | -         |      |      | -          |      |      |               |      |      |
| chr13  | 33088561  | 1917 | 2066 | -         |      |      | 33088561   | 1995 | 2133 | 33088560      | 2133 |      |
| chr16* | 69947046  | 2055 | 2826 |           |      |      |            |      |      |               |      |      |
| chr16* | 70169959  | 2055 | 2735 |           |      |      |            |      |      | 70169971      | 2064 | 2240 |
| chr16  | 74425602  | 2062 | 2665 |           |      |      |            |      |      |               |      |      |
| chr17* | 82105786  | 407  | 489  | 82105984  | 368  | 435  | 82105783   | 347  | 489  |               |      |      |
| chr17* | 82107626  | 2177 | 2321 | -         |      |      | 82107710   | 2048 | 2159 | 82107625      | 2045 |      |
| chr19  | 41783064  | 687  | 804  | -         |      |      | 41782971   | 761  | 905  |               |      |      |
| chr20  | 20473566  | 2415 | 2565 |           |      |      |            |      |      |               |      |      |

BSVF used WGBS data, and other software used WGS data.

\* supported by previous FISH experiments [8].

HB: Host breakpoint.

VB: Virus Begin is the revealed left most position on virus.

VE: Virus End is the right most position on virus.

1  
2  
3  
4  
5  
6  
7  
8  
9  
10  
11  
12  
13  
14  
15  
16  
17  
18  
19  
20  
21  
22  
23  
24  
25  
26  
27  
28  
29  
30  
31  
32  
33  
34  
35  
36  
37  
38  
39  
40  
41  
42  
43  
44  
45  
46  
47  
48  
49  
50  
51  
52  
53  
54  
55  
56  
57  
58  
59  
60  
61  
62  
63  
64  
65

1 **Figure 1. The illustration of bisulfite-altered sequence to the original.**

2

3 **Figure 2. Principal types of mapping reads around the viral integration site.**

4

5 **Figure 3. A demo plot of one viral integration cluster in its pre-insertion**  
6 **form.**

7

8

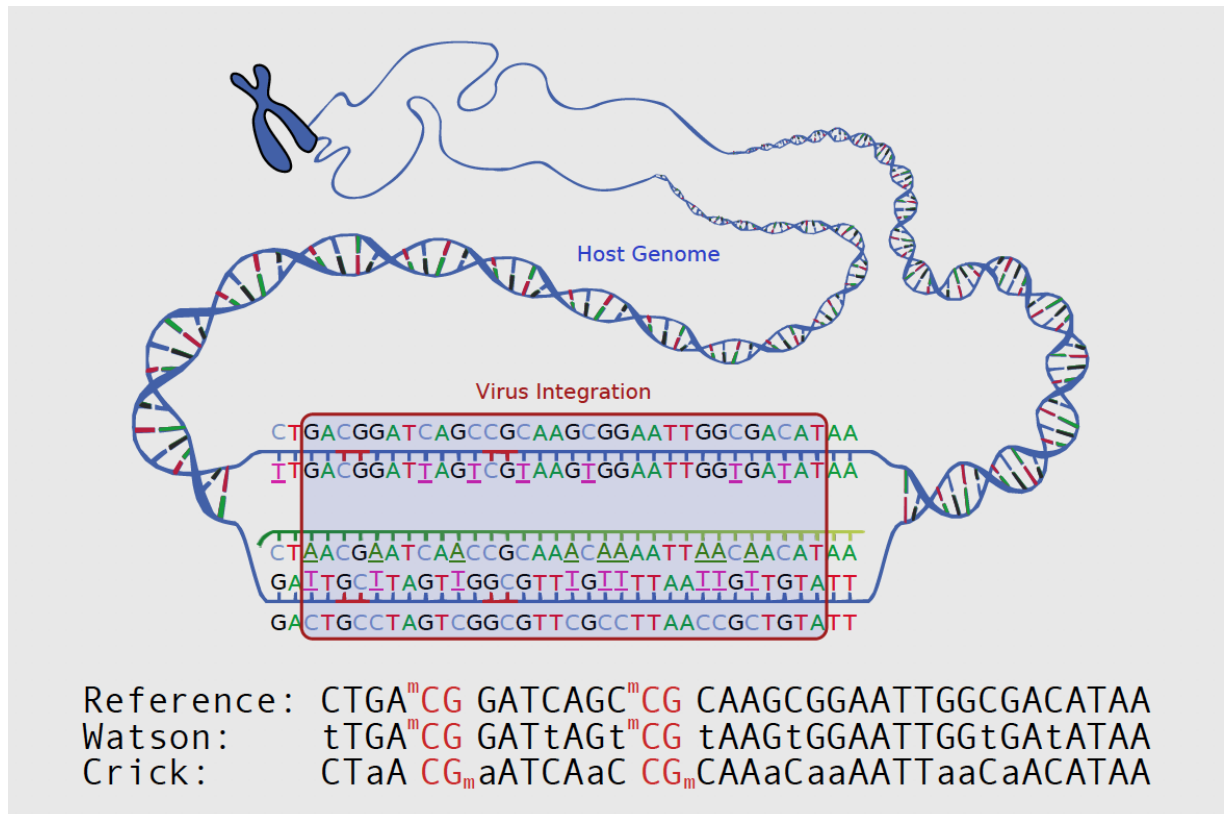

1

2 **Figure 1. The illustration of bisulfite-altered sequence to the original.**3 Reference is the original sequence prior to bisulfite treatment. After directional library preparation, we  
4 have two different conversion: Watson and Crick strand.5 Methylation sites were showed as red bases. Bisulfite treated base may alter the original base from C to  
6 T. m indicated methylation-modified base. Low-case letter indicates the bisulfite-altered base.7 As we can see, half of the probability of each T is C in Watson strand and half of the probability of each  
8 A is G in Crick strand.

9

10

11

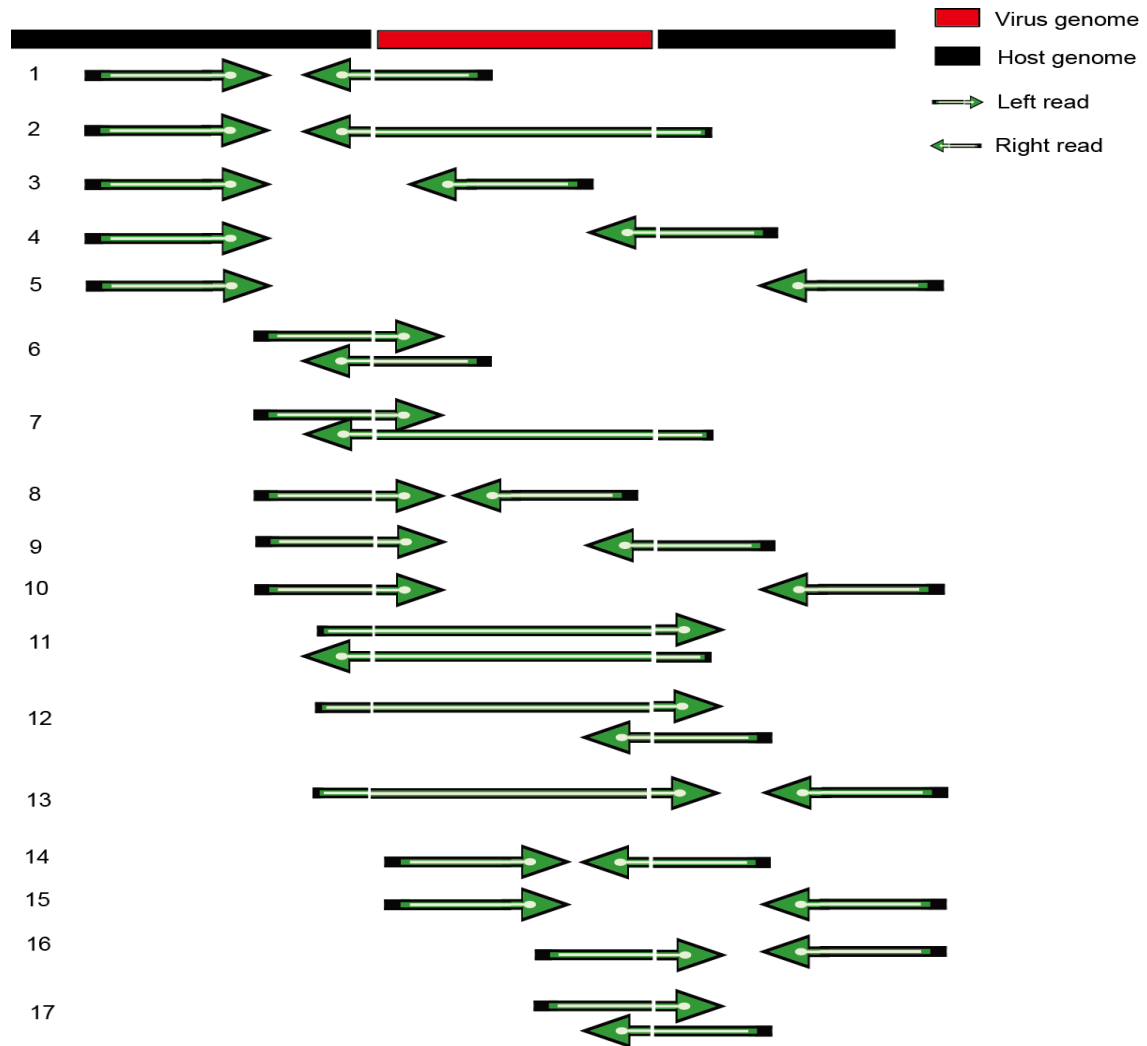

**Figure 2. Principal types of mapping reads around the viral integration site.** Red bar, the virus sequence inserted in host genome; Green arrow, mapping reads with different directions; Breakpoints indicate logical division between host genome and virus, which are physically linked.

1  
2  
3  
4  
5  
6  
7  
8  
9  
10  
11

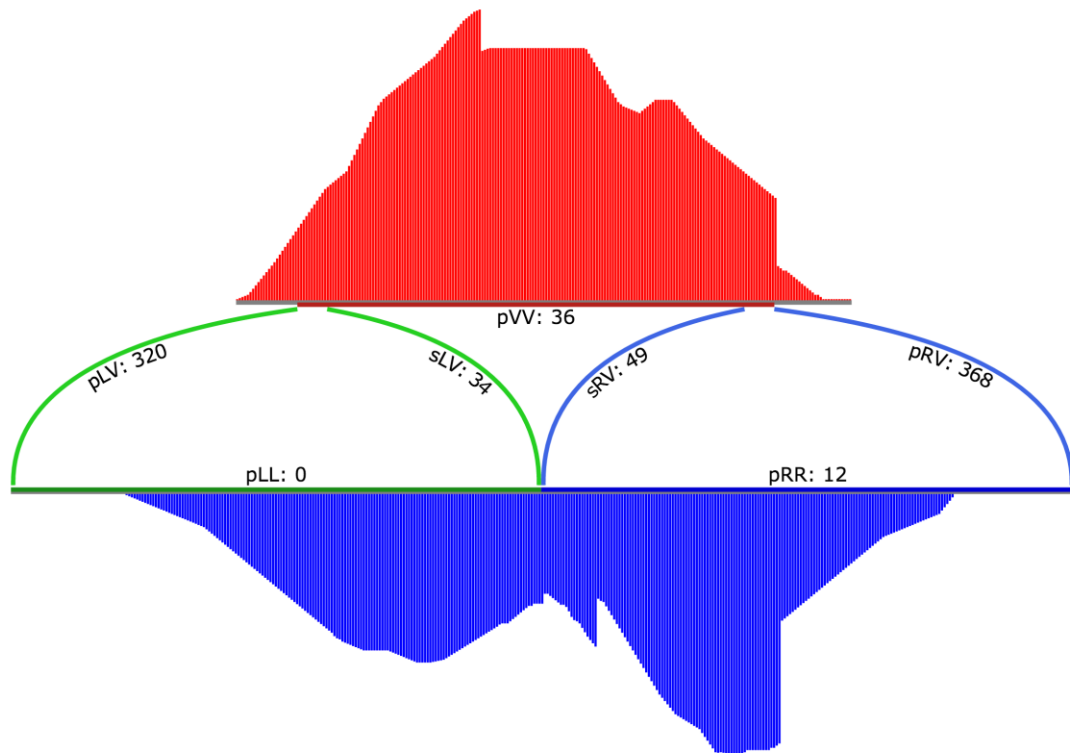

1  
2  
3  
4  
5  
6  
7  
8  
9  
10  
11  
12

**Figure 3. A demo plot of one viral integration cluster in its pre-insertion form.**

Plot was randomly selected from simulated breakpoints.

The red virus fragment(V) above will be inserted into the center point of the green(L) and blue(R) human fragment below to form the sequenced sample. Bars show the coverage depth of sequencing reads.

Curves represent the linkage events supported by pair-end sequencing reads, and the number besides shows the read count.



Click here to access/download  
**Supplementary Material**  
Supplementary-bsfinder.docx



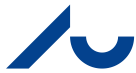

AARHUS  
UNIVERSITY

BIOINFORMATICS RESEARCH CENTRE (BIRC)

GigaScience Editorial Office

---

### Submission of final version of paper

Dear Editor in Chief

Thank you very much for accepting our paper "BS-virus-finder: virus integration calling using bisulfite-sequencing data" (GIGA-D-17-00032R1) cf. your e-mail dated September 29, 2017. We have addressed the points raised by the reviewers to the best of our abilities, and as outlined in our response to reviewers. We hope that you find everything in order.

Kind regards



Christian Nørgaard Storm Pedersen  
(on behalf of all the authors of the paper)

**Bioinformatics Research  
Centre (BiRC)**

**Christian Nørgaard Storm  
Pedersen**

Centre director, Associate  
professor

Date: 17 October 2017

Direct Tel.: +45 87155559  
Mobile Tel.: +45 27782810  
E-mail: cstorm@birc.au.dk

Web: au.dk/en/cstorm@birc

Sender's CVR no.: 31119103

Page 1 / 1
