# Supplementary material for: BS-virus-finder: virus integration calling using bisulfite sequencing data
Source: PubMed Central journal article supplement (PMC5788064; doi:10.1093/gigascience/gix123), 2017-12-18
Supplement: gix123_giga-d-17-00032_revision_3.pdf [file gix123_giga-d-17-00032_revision_3.pdf]

|                                                      |                                                                                                                                                                                                                                                                                                                                                                                                                                                                                                                                                                                                                                                                                                                                                                                                                        |                   |
|------------------------------------------------------|------------------------------------------------------------------------------------------------------------------------------------------------------------------------------------------------------------------------------------------------------------------------------------------------------------------------------------------------------------------------------------------------------------------------------------------------------------------------------------------------------------------------------------------------------------------------------------------------------------------------------------------------------------------------------------------------------------------------------------------------------------------------------------------------------------------------|-------------------|
| <b>Manuscript Number:</b>                            | GIGA-D-17-00032R3                                                                                                                                                                                                                                                                                                                                                                                                                                                                                                                                                                                                                                                                                                                                                                                                      |                   |
| <b>Full Title:</b>                                   | BS-virus-finder: virus integration calling using bisulfite-sequencing data                                                                                                                                                                                                                                                                                                                                                                                                                                                                                                                                                                                                                                                                                                                                             |                   |
| <b>Article Type:</b>                                 | Technical Note                                                                                                                                                                                                                                                                                                                                                                                                                                                                                                                                                                                                                                                                                                                                                                                                         |                   |
| <b>Funding Information:</b>                          | Young Scientists Fund of the National Natural Science Foundation of China (81602477)                                                                                                                                                                                                                                                                                                                                                                                                                                                                                                                                                                                                                                                                                                                                   | Dr. Shengjie Gao  |
|                                                      | Shenzhen Municipal Government of China (ZDSYS201507301424148)                                                                                                                                                                                                                                                                                                                                                                                                                                                                                                                                                                                                                                                                                                                                                          | Prof. Shengbin Li |
| <b>Abstract:</b>                                     | <p>Background: DNA methylation plays a key role in regulating gene expression and carcinogenesis. Extant methylation bisulfite sequencing (BS) researches mainly focus on calling SNP, DMR, and ASM, instead of virus integration positions.</p> <p>Findings: We developed a new and easy-to-use software, named as BS-virus-finder (<a href="https://github.com/BioInfoTools/BSVF">https://github.com/BioInfoTools/BSVF</a>), to detect viral integration breakpoints in whole human genomes.</p> <p>Conclusions: BS-virus-finder demonstrates moderate sensitivity and specificity, and is useful to be applied in epigenetic researches and to reveal the relationship between viral integration and DNA methylation. BS-virus-finder is the first software to detect virus by using bisulfite sequencing data.</p> |                   |
| <b>Corresponding Author:</b>                         | Christian Pedersen<br><br>DENMARK                                                                                                                                                                                                                                                                                                                                                                                                                                                                                                                                                                                                                                                                                                                                                                                      |                   |
| <b>Corresponding Author Secondary Information:</b>   |                                                                                                                                                                                                                                                                                                                                                                                                                                                                                                                                                                                                                                                                                                                                                                                                                        |                   |
| <b>Corresponding Author's Institution:</b>           |                                                                                                                                                                                                                                                                                                                                                                                                                                                                                                                                                                                                                                                                                                                                                                                                                        |                   |
| <b>Corresponding Author's Secondary Institution:</b> |                                                                                                                                                                                                                                                                                                                                                                                                                                                                                                                                                                                                                                                                                                                                                                                                                        |                   |
| <b>First Author:</b>                                 | Shengjie Gao                                                                                                                                                                                                                                                                                                                                                                                                                                                                                                                                                                                                                                                                                                                                                                                                           |                   |
| <b>First Author Secondary Information:</b>           |                                                                                                                                                                                                                                                                                                                                                                                                                                                                                                                                                                                                                                                                                                                                                                                                                        |                   |
| <b>Order of Authors:</b>                             | Shengjie Gao                                                                                                                                                                                                                                                                                                                                                                                                                                                                                                                                                                                                                                                                                                                                                                                                           |                   |
|                                                      | Xuesong Hu                                                                                                                                                                                                                                                                                                                                                                                                                                                                                                                                                                                                                                                                                                                                                                                                             |                   |
|                                                      | Fengping Xu                                                                                                                                                                                                                                                                                                                                                                                                                                                                                                                                                                                                                                                                                                                                                                                                            |                   |
|                                                      | Changduo Gao                                                                                                                                                                                                                                                                                                                                                                                                                                                                                                                                                                                                                                                                                                                                                                                                           |                   |
|                                                      | Kai Xiong                                                                                                                                                                                                                                                                                                                                                                                                                                                                                                                                                                                                                                                                                                                                                                                                              |                   |
|                                                      | Xiao Zhao                                                                                                                                                                                                                                                                                                                                                                                                                                                                                                                                                                                                                                                                                                                                                                                                              |                   |
|                                                      | Haixiao Chen                                                                                                                                                                                                                                                                                                                                                                                                                                                                                                                                                                                                                                                                                                                                                                                                           |                   |
|                                                      | Shancen Zhao                                                                                                                                                                                                                                                                                                                                                                                                                                                                                                                                                                                                                                                                                                                                                                                                           |                   |
|                                                      | Mengyao Wang                                                                                                                                                                                                                                                                                                                                                                                                                                                                                                                                                                                                                                                                                                                                                                                                           |                   |
|                                                      | Dongke Fu                                                                                                                                                                                                                                                                                                                                                                                                                                                                                                                                                                                                                                                                                                                                                                                                              |                   |
|                                                      | Xiaohui Zhao                                                                                                                                                                                                                                                                                                                                                                                                                                                                                                                                                                                                                                                                                                                                                                                                           |                   |
|                                                      | Jie Bai                                                                                                                                                                                                                                                                                                                                                                                                                                                                                                                                                                                                                                                                                                                                                                                                                |                   |
|                                                      | Likai Mao                                                                                                                                                                                                                                                                                                                                                                                                                                                                                                                                                                                                                                                                                                                                                                                                              |                   |
| Bo Li                                                |                                                                                                                                                                                                                                                                                                                                                                                                                                                                                                                                                                                                                                                                                                                                                                                                                        |                   |
| Song Wu                                              |                                                                                                                                                                                                                                                                                                                                                                                                                                                                                                                                                                                                                                                                                                                                                                                                                        |                   |

|                                                                                                                                                                                                                                                                                                                                                                                   |                                                                                                                                                                                                                                                                                                                                                                                                                                                                                                                                                                                                                                                                                                                                                                                                                                                                                                                                                                                                                                                                               |
|-----------------------------------------------------------------------------------------------------------------------------------------------------------------------------------------------------------------------------------------------------------------------------------------------------------------------------------------------------------------------------------|-------------------------------------------------------------------------------------------------------------------------------------------------------------------------------------------------------------------------------------------------------------------------------------------------------------------------------------------------------------------------------------------------------------------------------------------------------------------------------------------------------------------------------------------------------------------------------------------------------------------------------------------------------------------------------------------------------------------------------------------------------------------------------------------------------------------------------------------------------------------------------------------------------------------------------------------------------------------------------------------------------------------------------------------------------------------------------|
|                                                                                                                                                                                                                                                                                                                                                                                   | Jian Wang                                                                                                                                                                                                                                                                                                                                                                                                                                                                                                                                                                                                                                                                                                                                                                                                                                                                                                                                                                                                                                                                     |
|                                                                                                                                                                                                                                                                                                                                                                                   | Shengbin Li                                                                                                                                                                                                                                                                                                                                                                                                                                                                                                                                                                                                                                                                                                                                                                                                                                                                                                                                                                                                                                                                   |
|                                                                                                                                                                                                                                                                                                                                                                                   | Huanming Yang                                                                                                                                                                                                                                                                                                                                                                                                                                                                                                                                                                                                                                                                                                                                                                                                                                                                                                                                                                                                                                                                 |
|                                                                                                                                                                                                                                                                                                                                                                                   | Lars Bolund                                                                                                                                                                                                                                                                                                                                                                                                                                                                                                                                                                                                                                                                                                                                                                                                                                                                                                                                                                                                                                                                   |
|                                                                                                                                                                                                                                                                                                                                                                                   | Christian Pedersen                                                                                                                                                                                                                                                                                                                                                                                                                                                                                                                                                                                                                                                                                                                                                                                                                                                                                                                                                                                                                                                            |
| <b>Order of Authors Secondary Information:</b>                                                                                                                                                                                                                                                                                                                                    |                                                                                                                                                                                                                                                                                                                                                                                                                                                                                                                                                                                                                                                                                                                                                                                                                                                                                                                                                                                                                                                                               |
| <b>Response to Reviewers:</b>                                                                                                                                                                                                                                                                                                                                                     | <p>GIGA-D-17-00032R2<br/> BS-virus-finder: virus integration calling using bisulfite-sequencing data<br/> Shengjie Gao; Xuesong Hu; Changduo Gao; Kai Xiong; Fengping Xu; Xiao Zhao;<br/> Haixiao Chen; Shancen Zhao; Mengyao Wang; Dongke Fu; Xiaohui Zhao; Jie Bai;<br/> Likai Mao; Bo Li; Song Wu; Jian Wang; Shengbin Li; Huanming Yang; Lars Bolund;<br/> Christian Pedersen<br/> GigaScience</p> <p>Dear Christian,</p> <p>Please refer to my previous email from my personal account and the attached word doc. This email is just to convince Editorial Manager to let you upload your final version via the system.</p> <p>Once you have made the necessary corrections, please submit a revised manuscript online at:</p> <p><a href="http://giga.edmgr.com/">http://giga.edmgr.com/</a></p> <p>If you have forgotten your username or password please use the "Send Login Details" link to get your login information. For security reasons, your password will be reset.</p> <p>Thank you sir! I have completed the revision and submitted the final version.</p> |
| <b>Additional Information:</b>                                                                                                                                                                                                                                                                                                                                                    |                                                                                                                                                                                                                                                                                                                                                                                                                                                                                                                                                                                                                                                                                                                                                                                                                                                                                                                                                                                                                                                                               |
| <b>Question</b>                                                                                                                                                                                                                                                                                                                                                                   | <b>Response</b>                                                                                                                                                                                                                                                                                                                                                                                                                                                                                                                                                                                                                                                                                                                                                                                                                                                                                                                                                                                                                                                               |
| Are you submitting this manuscript to a special series or article collection?                                                                                                                                                                                                                                                                                                     | No                                                                                                                                                                                                                                                                                                                                                                                                                                                                                                                                                                                                                                                                                                                                                                                                                                                                                                                                                                                                                                                                            |
| <b>Experimental design and statistics</b>                                                                                                                                                                                                                                                                                                                                         | Yes                                                                                                                                                                                                                                                                                                                                                                                                                                                                                                                                                                                                                                                                                                                                                                                                                                                                                                                                                                                                                                                                           |
| <p>Full details of the experimental design and statistical methods used should be given in the Methods section, as detailed in our <a href="#">Minimum Standards Reporting Checklist</a>. Information essential to interpreting the data presented should be made available in the figure legends.</p> <p>Have you included all the information requested in your manuscript?</p> |                                                                                                                                                                                                                                                                                                                                                                                                                                                                                                                                                                                                                                                                                                                                                                                                                                                                                                                                                                                                                                                                               |
| <b>Resources</b>                                                                                                                                                                                                                                                                                                                                                                  | Yes                                                                                                                                                                                                                                                                                                                                                                                                                                                                                                                                                                                                                                                                                                                                                                                                                                                                                                                                                                                                                                                                           |
| A description of all resources used, including antibodies, cell lines, animals and software tools, with enough                                                                                                                                                                                                                                                                    |                                                                                                                                                                                                                                                                                                                                                                                                                                                                                                                                                                                                                                                                                                                                                                                                                                                                                                                                                                                                                                                                               |

|                                                                                                                                                                                                                                                                                                                                                                                                                                                                                                                                                         |            |
|---------------------------------------------------------------------------------------------------------------------------------------------------------------------------------------------------------------------------------------------------------------------------------------------------------------------------------------------------------------------------------------------------------------------------------------------------------------------------------------------------------------------------------------------------------|------------|
| <p>information to allow them to be uniquely identified, should be included in the Methods section. Authors are strongly encouraged to cite <a href="#">Research Resource Identifiers</a> (RRIDs) for antibodies, model organisms and tools, where possible.</p> <p>Have you included the information requested as detailed in our <a href="#">Minimum Standards Reporting Checklist</a>?</p>                                                                                                                                                            |            |
| <p><b>Availability of data and materials</b></p> <p>All datasets and code on which the conclusions of the paper rely must be either included in your submission or deposited in <a href="#">publicly available repositories</a> (where available and ethically appropriate), referencing such data using a unique identifier in the references and in the “Availability of Data and Materials” section of your manuscript.</p> <p>Have you have met the above requirement as detailed in our <a href="#">Minimum Standards Reporting Checklist</a>?</p> | <p>Yes</p> |

# BS-virus-finder: virus integration calling using bisulfite sequencing data

Shengjie Gao<sup>1,2,3,7,8,9\*</sup>, Xuesong Hu<sup>2,3\*</sup>, Fengping Xu<sup>3,10,13\*</sup>, Changduo Gao<sup>4</sup>, Kai Xiong<sup>5</sup>, Xiao Zhao<sup>2,11</sup>, Haixiao Chen<sup>3,13</sup>, Shancen Zhao<sup>3,7</sup>, Mengyao Wang<sup>3</sup>, Dongke Fu<sup>2</sup>, Xiaohui Zhao<sup>6</sup>, Jie Bai<sup>3</sup>, Likai Mao<sup>3</sup>, Bo Li<sup>2,3</sup>, Song Wu<sup>8</sup>, Jian Wang<sup>3</sup>, Shengbin Li<sup>2,12,14</sup>, Huangming Yang<sup>3,7,11</sup>, Lars Bolund<sup>9#</sup>, Christian N. S. Pedersen<sup>1#</sup>

<sup>1</sup> Bioinformatics Research Centre, Aarhus University, Aarhus, Denmark

<sup>2</sup> Forensics Genomics International (FGI), BGI-Shenzhen, Shenzhen 518083, China

<sup>3</sup> BGI-Shenzhen, Shenzhen 518083, China

<sup>4</sup> College of Computer Science & Technology, Qingdao University, Qingdao 266071, China

<sup>5</sup> Department of Veterinary Clinical and Animal Sciences, University of Copenhagen, Copenhagen, Denmark

<sup>6</sup> College of Mathematics & Statistics, Changsha University of Science & Technology, Changsha 410114, China

<sup>7</sup> James D. Watson Institute of Genome Sciences, Hangzhou 310058, China

<sup>8</sup> The Affiliated Luohu Hospital of Shenzhen University, Shenzhen University, Shenzhen 518000, China.

<sup>9</sup> Department of Biomedicine, Aarhus University, Aarhus, Denmark

<sup>10</sup> Department of Biology, University of Copenhagen, Copenhagen, Denmark

<sup>11</sup> BGI Education Center, University of Chinese Academy of Sciences.

<sup>12</sup> Shenzhen Key Laboratory of Forensics, BGI-Shenzhen, Shenzhen 518083, China.

<sup>13</sup> China National GeneBank, BGI-Shenzhen, Shenzhen 518120, China

<sup>14</sup> College of Medicine and Forensics, XJTU. Xian China

\* These authors contributed equally to this work

# Corresponding authors

1

## 2 **Abstract**

3 **Background:** DNA methylation plays a key role in the regulation of gene expression and  
4 carcinogenesis. Bisulfite sequencing studies mainly focus on calling SNP, DMR, and ASM.  
5 Until now, only a few software tools focus on virus integration using bisulfite sequencing  
6 data.

7 **Findings:** We have developed a new and easy-to-use software tool, named BS-virus-finder  
8 (BSVF, RRID: SCR\_015727), to detect viral integration breakpoints in whole human genomes.  
9 The tool is hosted at <https://github.com/BGI-SZ/BSVF>.

10 **Conclusions:** BS-virus-finder demonstrates high sensitivity and specificity. It is useful in  
11 epigenetic studies and to reveal the relationship between viral integration and DNA  
12 methylation. BS-virus-finder is the first software tool to detect virus integration loci by using  
13 bisulfite sequencing data.

14 **Keyword:** Virus integration, Bisulfite sequencing, Carcinogenesis

15

16

17

18

19

1  
2  
3  
4  
5  
6  
7  
8  
9  
10  
11  
12  
13  
14  
15  
16  
17  
18  
19  
20  
21  
22  
23  
24  
25  
26  
27  
28  
29  
30  
31  
32  
33  
34  
35  
36  
37  
38  
39  
40  
41  
42  
43  
44  
45  
46  
47  
48  
49  
50  
51  
52  
53  
54  
55  
56  
57  
58  
59  
60  
61  
62  
63  
64  
65

1

## 2 **Findings**

### 3 **Introduction**

4 DNA methylation plays crucial roles in many areas including development [1, 2] and X  
5 chromosome inactivation [3] by regulating genetic imprinting and epigenetic modification  
6 without altering DNA sequences. Previous studies have shown strong association of DNA  
7 methylation with cancer. The methylation status altering related to carcinogenesis [4], cancer  
8 recurrence [5] and metastasis [6] has already been revealed by emerging bisulfite sequencing  
9 (BS) technology. BS technology can investigate DNA methylation changes with single-base  
10 accuracy. Treatment of DNA with bisulfite converts unmethylated cytosine residues to uracil,  
11 but leaves 5-methylcytosine residues unmodified [7]. Thus, bisulfite treatment introduces  
12 specific changes in the DNA sequence that depend on the methylation status of individual  
13 cytosine residues, yielding single-nucleotide resolution information about the methylation  
14 status of a segment of DNA (Figure 1). Various analyses can be performed on the altered  
15 sequences to retrieve this information. BS technology can reveal differences between  
16 cytosines and thymidine and sequence change resulting from bisulfite conversion. For the  
17 bases without methylation, all C will change to T on both strands. After directional library  
18 preparation, we have two different conversions: The Watson, and the Crick strand, as shown  
19 in Figure 1. On the Watson strand, methylated C remains C, and unmethylated C changes to T.  
20 On the Crick strand, the reverse complement happens, i.e. methylated C remains C but in  
21 sequenced reads it is reverse complemented to G, and unmethylated C changes to T, leading to

1 the reverse complement base A in sequenced reads. Since base C can either be methylated or  
2 unmethylated, we can use IUPAC nucleotide code “Y” and “R” to represent C/T and G/A  
3 respectively. So, after bisulfite treatment, base C changes to Y on the Watson strand, and base  
4 G changes to R on the Crick strand.

6 Whole-genome based bisulfite sequencing (WGBS) has been developed to detect DNA  
7 methylation. Recent clinical studies showed that DNA methylation is associated with viral  
8 integration [8, 9]. Whole-genome BS (WGBS) data can be analyzed to investigate the  
9 sequence mapping and alignment via BSMAP [10], Bismark [11] and bwa-meth [12], to detect  
10 DMR (different methylation regions) via software QDMR [13], DMAP [14] and SMAP [15],  
11 to identify SNP (single nucleotide polymorphism) via BS-SNPer [16] and Bis-SNP [17], to  
12 find ASM (allele-specific DNA methylation) via SMAP [15], Methy-Pipe [18]. However,  
13 none of them can be used for virus integration loci calling, and no software tool is currently  
14 available to detect virus integration loci by analyzing BS data. Therefore, we have developed a  
15 software tool to detect the virus integration loci by genome-wide BS analysis.

16 **Description of in silico and real data.**

17 Different types of PE (paired-end) reads (50bp, 90bp, 150bp) that include 700 breakpoints in  
18 chromosome 1 (chr 1) of GRCh38 were simulated in our study. Input fragments of 50 to 400  
19 bp were randomly selected from chr 1 in the GRCh38 assembly of the human genome. The  
20 HBV genome (GenBank: X04615.1) was used in our simulation. Its integration length was  
21 between 45 bp and 180 bp. We cut HBV containing segments with given pair-end insert size

1 at all possible positions on every integration events. After alignment, mapping accuracy of  
2 each of the 17 different types of reads mapping was calculated (Figure 2). Mapping accuracy  
3 varied among the 17 types of read mappings in our simulation (Figure S1, S2, S3). In  
4 summary, the accuracies of several kinds of the read mappings were low (Table S1, S2, S3),  
5 which may raise the false-negative rate. Generally, however, bwa-meth [12] performed very  
6 well.

7  
8 Bisulfite sequencing is a sophisticated technique to study DNA cytosine methylation. Bisulfite  
9 treatment followed by PCR amplification specifically converts unmethylated cytosine to  
10 thymine. By cooperating with next generation sequencing technology, it is able to detect the  
11 methylation status of every cytosine in the whole genome. Moreover, longer reads make it  
12 possible to achieve higher accuracy. Besides simulated data, the PLC/PRF/5 hepatocellular  
13 carcinoma cell lines (from American Type Culture Collection, ATCC, Manassas, VA) were  
14 cultured as previously described [19]. The cell line was validated by STR makers (Figure S4).  
15 We performed WGS and WGBS sequencing of this cell line, the results are shown in Table S4.  
16 Table 1 shows the analysis result for WGS data, which was compared with the output results  
17 analyzed by Vy-per [20], virus-clip[21] and Virus Finder2 [22].

## 18 **Methods**

### 19 *Sample preparation*

20 PLC/PRF/5 hepatocellular carcinoma cell line was obtained from American Type Culture  
21 Collection (ATCC, Manassas, VA) and was cultured as previously described [19] and



1 validated by STR makers (Figure S4). Totally 15 µg DNA was extracted to perform WGS and  
2  
3  
4 WGBS sequencing. Sample concentration was detected by fluorometer (QubitFluorometer,  
5  
6  
7 Invitrogen). Sample integrity and purification was determined by Agarose Gel  
8  
9  
10 Electrophoresis.

#### 11 *Whole genome sequencing*

12  
13 About 1.5 µg gDNA was sonicated to 100-300 bp fragment genome DNA by Sonication  
14  
15  
16  
17  
18  
19  
20  
21  
22  
23  
24  
25  
26  
27  
28  
29  
30  
31  
32  
33  
34  
35  
36  
37  
38  
39  
40  
41  
42  
43  
44  
45  
46  
47  
48  
49  
50  
51  
52  
53  
54  
55  
56  
57  
58  
59  
60  
61  
62  
63  
64  
65  
66  
67  
68  
69  
70  
71  
72  
73  
74  
75  
76  
77  
78  
79  
80  
81  
82  
83  
84  
85  
86  
87  
88  
89  
90  
91  
92  
93  
94  
95  
96  
97  
98  
99  
100  
101  
102  
103  
104  
105  
106  
107  
108  
109  
110  
111  
112  
113  
114  
115  
116  
117  
118  
119  
120  
121  
122  
123  
124  
125  
126  
127  
128  
129  
130  
131  
132  
133  
134  
135  
136  
137  
138  
139  
140  
141  
142  
143  
144  
145  
146  
147  
148  
149  
150  
151  
152  
153  
154  
155  
156  
157  
158  
159  
160  
161  
162  
163  
164  
165  
166  
167  
168  
169  
170  
171  
172  
173  
174  
175  
176  
177  
178  
179  
180  
181  
182  
183  
184  
185  
186  
187  
188  
189  
190  
191  
192  
193  
194  
195  
196  
197  
198  
199  
200  
201  
202  
203  
204  
205  
206  
207  
208  
209  
210  
211  
212  
213  
214  
215  
216  
217  
218  
219  
220  
221  
222  
223  
224  
225  
226  
227  
228  
229  
230  
231  
232  
233  
234  
235  
236  
237  
238  
239  
240  
241  
242  
243  
244  
245  
246  
247  
248  
249  
250  
251  
252  
253  
254  
255  
256  
257  
258  
259  
260  
261  
262  
263  
264  
265  
266  
267  
268  
269  
270  
271  
272  
273  
274  
275  
276  
277  
278  
279  
280  
281  
282  
283  
284  
285  
286  
287  
288  
289  
290  
291  
292  
293  
294  
295  
296  
297  
298  
299  
300  
301  
302  
303  
304  
305  
306  
307  
308  
309  
310  
311  
312  
313  
314  
315  
316  
317  
318  
319  
320  
321  
322  
323  
324  
325  
326  
327  
328  
329  
330  
331  
332  
333  
334  
335  
336  
337  
338  
339  
340  
341  
342  
343  
344  
345  
346  
347  
348  
349  
350  
351  
352  
353  
354  
355  
356  
357  
358  
359  
360  
361  
362  
363  
364  
365  
366  
367  
368  
369  
370  
371  
372  
373  
374  
375  
376  
377  
378  
379  
380  
381  
382  
383  
384  
385  
386  
387  
388  
389  
390  
391  
392  
393  
394  
395  
396  
397  
398  
399  
400  
401  
402  
403  
404  
405  
406  
407  
408  
409  
410  
411  
412  
413  
414  
415  
416  
417  
418  
419  
420  
421  
422  
423  
424  
425  
426  
427  
428  
429  
430  
431  
432  
433  
434  
435  
436  
437  
438  
439  
440  
441  
442  
443  
444  
445  
446  
447  
448  
449  
450  
451  
452  
453  
454  
455  
456  
457  
458  
459  
460  
461  
462  
463  
464  
465  
466  
467  
468  
469  
470  
471  
472  
473  
474  
475  
476  
477  
478  
479  
480  
481  
482  
483  
484  
485  
486  
487  
488  
489  
490  
491  
492  
493  
494  
495  
496  
497  
498  
499  
500  
501  
502  
503  
504  
505  
506  
507  
508  
509  
510  
511  
512  
513  
514  
515  
516  
517  
518  
519  
520  
521  
522  
523  
524  
525  
526  
527  
528  
529  
530  
531  
532  
533  
534  
535  
536  
537  
538  
539  
540  
541  
542  
543  
544  
545  
546  
547  
548  
549  
550  
551  
552  
553  
554  
555  
556  
557  
558  
559  
560  
561  
562  
563  
564  
565  
566  
567  
568  
569  
570  
571  
572  
573  
574  
575  
576  
577  
578  
579  
580  
581  
582  
583  
584  
585  
586  
587  
588  
589  
590  
591  
592  
593  
594  
595  
596  
597  
598  
599  
600  
601  
602  
603  
604  
605  
606  
607  
608  
609  
610  
611  
612  
613  
614  
615  
616  
617  
618  
619  
620  
621  
622  
623  
624  
625  
626  
627  
628  
629  
630  
631  
632  
633  
634  
635  
636  
637  
638  
639  
640  
641  
642  
643  
644  
645  
646  
647  
648  
649  
650  
651  
652  
653  
654  
655  
656  
657  
658  
659  
660  
661  
662  
663  
664  
665  
666  
667  
668  
669  
670  
671  
672  
673  
674  
675  
676  
677  
678  
679  
680  
681  
682  
683  
684  
685  
686  
687  
688  
689  
690  
691  
692  
693  
694  
695  
696  
697  
698  
699  
700  
701  
702  
703  
704  
705  
706  
707  
708  
709  
710  
711  
712  
713  
714  
715  
716  
717  
718  
719  
720  
721  
722  
723  
724  
725  
726  
727  
728  
729  
730  
731  
732  
733  
734  
735  
736  
737  
738  
739  
740  
741  
742  
743  
744  
745  
746  
747  
748  
749  
750  
751  
752  
753  
754  
755  
756  
757  
758  
759  
760  
761  
762  
763  
764  
765  
766  
767  
768  
769  
770  
771  
772  
773  
774  
775  
776  
777  
778  
779  
780  
781  
782  
783  
784  
785  
786  
787  
788  
789  
790  
791  
792  
793  
794  
795  
796  
797  
798  
799  
800  
801  
802  
803  
804  
805  
806  
807  
808  
809  
810  
811  
812  
813  
814  
815  
816  
817  
818  
819  
820  
821  
822  
823  
824  
825  
826  
827  
828  
829  
830  
831  
832  
833  
834  
835  
836  
837  
838  
839  
840  
841  
842  
843  
844  
845  
846  
847  
848  
849  
850  
851  
852  
853  
854  
855  
856  
857  
858  
859  
860  
861  
862  
863  
864  
865  
866  
867  
868  
869  
870  
871  
872  
873  
874  
875  
876  
877  
878  
879  
880  
881  
882  
883  
884  
885  
886  
887  
888  
889  
890  
891  
892  
893  
894  
895  
896  
897  
898  
899  
900  
901  
902  
903  
904  
905  
906  
907  
908  
909  
910  
911  
912  
913  
914  
915  
916  
917  
918  
919  
920  
921  
922  
923  
924  
925  
926  
927  
928  
929  
930  
931  
932  
933  
934  
935  
936  
937  
938  
939  
940  
941  
942  
943  
944  
945  
946  
947  
948  
949  
950  
951  
952  
953  
954  
955  
956  
957  
958  
959  
960  
961  
962  
963  
964  
965  
966  
967  
968  
969  
970  
971  
972  
973  
974  
975  
976  
977  
978  
979  
980  
981  
982  
983  
984  
985  
986  
987  
988  
989  
990  
991  
992  
993  
994  
995  
996  
997  
998  
999  
1000  
1001  
1002  
1003  
1004  
1005  
1006  
1007  
1008  
1009  
1010  
1011  
1012  
1013  
1014  
1015  
1016  
1017  
1018  
1019  
1020  
1021  
1022  
1023  
1024  
1025  
1026  
1027  
1028  
1029  
1030  
1031  
1032  
1033  
1034  
1035  
1036  
1037  
1038  
1039  
1040  
1041  
1042  
1043  
1044  
1045  
1046  
1047  
1048  
1049  
1050  
1051  
1052  
1053  
1054  
1055  
1056  
1057  
1058  
1059  
1060  
1061  
1062  
1063  
1064  
1065  
1066  
1067  
1068  
1069  
1070  
1071  
1072  
1073  
1074  
1075  
1076  
1077  
1078  
1079  
1080  
1081  
1082  
1083  
1084  
1085  
1086  
1087  
1088  
1089  
1090  
1091  
1092  
1093  
1094  
1095  
1096  
1097  
1098  
1099  
1100  
1101  
1102  
1103  
1104  
1105  
1106  
1107  
1108  
1109  
1110  
1111  
1112  
1113  
1114  
1115  
1116  
1117  
1118  
1119  
1120  
1121  
1122  
1123  
1124  
1125  
1126  
1127  
1128  
1129  
1130  
1131  
1132  
1133  
1134  
1135  
1136  
1137  
1138  
1139  
1140  
1141  
1142  
1143  
1144  
1145  
1146  
1147  
1148  
1149  
1150  
1151  
1152  
1153  
1154  
1155  
1156  
1157  
1158  
1159  
1160  
1161  
1162  
1163  
1164  
1165  
1166  
1167  
1168  
1169  
1170  
1171  
1172  
1173  
1174  
1175  
1176  
1177  
1178  
1179  
1180  
1181  
1182  
1183  
1184  
1185  
1186  
1187  
1188  
1189  
1190  
1191  
1192  
1193  
1194  
1195  
1196  
1197  
1198  
1199  
1200  
1201  
1202  
1203  
1204  
1205  
1206  
1207  
1208  
1209  
1210  
1211  
1212  
1213  
1214  
1215  
1216  
1217  
1218  
1219  
1220  
1221  
1222  
1223  
1224  
1225  
1226  
1227  
1228  
1229  
1230  
1231  
1232  
1233  
1234  
1235  
1236  
1237  
1238  
1239  
1240  
1241  
1242  
1243  
1244  
1245  
1246  
1247  
1248  
1249  
1250  
1251  
1252  
1253  
1254  
1255  
1256  
1257  
1258  
1259  
1260  
1261  
1262  
1263  
1264  
1265  
1266  
1267  
1268  
1269  
1270  
1271  
1272  
1273  
1274  
1275  
1276  
1277  
1278  
1279  
1280  
1281  
1282  
1283  
1284  
1285  
1286  
1287  
1288  
1289  
1290  
1291  
1292  
1293  
1294  
1295  
1296  
1297  
1298  
1299  
1300  
1301  
1302  
1303  
1304  
1305  
1306  
1307  
1308  
1309  
1310  
1311  
1312  
1313  
1314  
1315  
1316  
1317  
1318  
1319  
1320  
1321  
1322  
1323  
1324  
1325  
1326  
1327  
1328  
1329  
1330  
1331  
1332  
1333  
1334  
1335  
1336  
1337  
1338  
1339  
1340  
1341  
1342  
1343  
1344  
1345  
1346  
1347  
1348  
1349  
1350  
1351  
1352  
1353  
1354  
1355  
1356  
1357  
1358  
1359  
1360  
1361  
1362  
1363  
1364  
1365  
1366  
1367  
1368  
1369  
1370  
1371  
1372  
1373  
1374  
1375  
1376  
1377  
1378  
1379  
1380  
1381  
1382  
1383  
1384  
1385  
1386  
1387  
1388  
1389  
1390  
1391  
1392  
1393  
1394  
1395  
1396  
1397  
1398  
1399  
1400  
1401  
1402  
1403  
1404  
1405  
1406  
1407  
1408  
1409  
1410  
1411  
1412  
1413  
1414  
1415  
1416  
1417  
1418  
1419  
1420  
1421  
1422  
1423  
1424  
1425  
1426  
1427  
1428  
1429  
1430  
1431  
1432  
1433  
1434  
1435  
1436  
1437  
1438  
1439  
1440  
1441  
1442  
1443  
1444  
1445  
1446  
1447  
1448  
1449  
1450  
1451  
1452  
1453  
1454  
1455  
1456  
1457  
1458  
1459  
1460  
1461  
1462  
1463  
1464  
1465  
1466  
1467  
1468  
1469  
1470  
1471  
1472  
1473  
1474  
1475  
1476  
1477  
1478  
1479  
1480  
1481  
1482  
1483  
1484  
1485  
1486  
1487  
1488  
1489  
1490  
1491  
1492  
1493  
1494  
1495  
1496  
1497  
1498  
1499  
1500  
1501  
1502  
1503  
1504  
1505  
1506  
1507  
1508  
1509  
1510  
1511  
1512  
1513  
1514  
1515  
1516  
1517  
1518  
1519  
1520  
1521  
1522  
1523  
1524  
1525  
1526  
1527  
1528  
1529  
1530  
1531  
1532  
1533  
1534  
1535  
1536  
1537  
1538  
1539  
1540  
1541  
1542  
1543  
1544  
1545  
1546  
1547  
1548  
1549  
1550  
1551  
1552  
1553  
1554  
1555  
1556  
1557  
1558  
1559  
1560  
1561  
1562  
1563  
1564  
1565  
1566  
1567  
1568  
1569  
1570  
1571  
1572  
1573  
1574  
1575  
1576  
1577  
1578  
1579  
1580  
1581  
1582  
1583  
1584  
1585  
1586  
1587  
1588  
1589  
1590  
1591  
1592  
1593  
1594  
1595  
1596  
1597  
1598  
1599  
1600  
1601  
1602  
1603  
1604  
1605  
1606  
1607  
1608  
1609  
1610  
1611  
1612  
1613  
1614  
1615  
1616  
1617  
1618  
1619  
1620  
1621  
1622  
1623  
1624  
1625  
1626  
1627  
1628  
1629  
1630  
1631  
1632  
1633  
1634  
1635  
1636  
1637  
1638  
1639  
1640  
1641  
1642  
1643  
1644  
1645  
1646  
1647  
1648  
1649  
1650  
1651  
1652  
1653  
1654  
1655  
1656  
1657  
1658  
1659  
1660  
1661  
1662  
1663  
1664  
1665  
1666  
1667  
1668  
1669  
1670  
1671  
1672  
1673  
1674  
1675  
1676  
1677  
1678  
1679  
1680  
1681  
1682  
1683  
1684  
1685  
1686  
1687  
1688  
1689  
1690  
1691  
1692  
1693  
1694  
1695  
1696  
1697  
1698  
1699  
1700  
1701  
1702  
1703  
1704  
1705  
1706  
1707  
1708  
1709  
1710  
1711  
1712  
1713  
1714  
1715  
1716  
1717  
1718  
1719  
1720  
1721  
1722  
1723  
1724  
1725  
1726  
1727  
1728  
1729  
1730  
1731  
1732  
1733  
1734  
1735  
1736  
1737  
1738  
1739  
1740  
1741  
1742  
1743  
1744  
1745  
1746  
1747  
1748  
1749  
1750  
1751  
1752  
1753  
1754  
1755  
1756  
1757  
1758  
1759  
1760  
1761  
1762  
1763  
1764  
1765  
1766  
1767  
1768  
1769  
1770  
1771  
1772  
1773  
1774  
1775  
1776  
1777  
1778  
1779  
1780  
1781  
1782  
1783  
1784  
1785  
1786  
1787  
1788  
1789  
1790  
1791  
1792  
1793  
1794  
1795  
1796  
1797  
1798  
1799  
1800  
1801  
1802  
1803  
1804  
1805  
1806  
1807  
1808  
1809  
1810  
1811  
1812  
1813  
1814  
1815  
1816  
1817  
1818  
1819  
1820  
1821  
1822  
1823  
1824  
1825  
1826  
1827  
1828  
1829  
1830  
1831  
1832  
1833  
1834  
1835  
1836  
1837  
1838  
1839  
1840  
1841  
1842  
1843  
1844  
1845  
1846  
1847  
1848  
1849  
1850  
1851  
1852  
1853  
1854  
1855  
1856  
1857  
1858  
1859  
1860  
1861  
1862  
1863  
1864  
1865  
1866  
1867  
1868  
1869  
1870  
1871  
1872  
1873  
1874  
1875  
1876  
1877  
1878  
1879  
1880  
1881  
1882  
1883  
1884  
1885  
1886  
1887  
1888  
1889  
1890  
1891  
1892  
1893  
1894  
1895  
1896  
1897  
1898  
1899  
1900  
1901  
1902  
1903  
1904  
1905  
1906  
1907  
1908  
1909  
1910  
1911  
1912  
1913  
1914  
1915  
1916  
1917  
1918  
1919  
1920  
1921  
1922  
1923  
1924  
1925  
1926  
1927  
1928  
1929  
1930  
1931  
1932  
1933  
1934  
1935  
1936  
1937  
1938  
1939  
1940  
1941  
1942  
1943  
1944  
1945  
1946  
1947  
1948  
1949  
1950  
1951  
1952  
1953  
1954  
1955  
1956  
1957  
1958  
1959  
1960  
1961  
1962  
1963  
1964  
1965  
1966  
1967  
1968  
1969  
1970  
1971  
1972  
1973  
1974  
1975  
1976  
1977  
1978  
1979  
1980  
1981  
1982  
1983  
1984  
1985  
1986  
1987  
1988  
1989  
1990  
1991  
1992  
1993  
1994  
1995  
1996  
1997  
1998  
1999  
2000  
2001  
2002  
2003  
2004  
2005  
2006  
2007  
2008  
2009  
2010  
2011  
2012  
2013  
2014  
2015  
2016  
2017  
2018  
2019  
2020  
2021  
2022  
2023  
2024  
2025  
2026  
2027  
2028  
2029  
2030  
2031  
2032  
2033  
2034  
2035  
2036  
2037  
2038  
2039  
2040  
2041  
2042  
2043  
2044  
2045  
2046  
2047  
2048  
2049  
2050  
2051  
2052  
2053  
2054  
2055  
2056  
2057  
2058  
2059  
2060  
2061  
2062  
2063  
2064  
2065  
2066  
2067  
2068  
2069  
2070  
2071  
2072  
2073  
2074  
2075  
2076  
2077  
2078  
2079  
2080  
2081  
2082  
2083  
2084  
2085  
2086  
2087  
2088  
2089  
2090  
2091  
2092  
2093  
2094  
2095  
2096  
2097  
2098  
2099  
2100  
2101  
2102  
2103  
2104  
2105  
2106  
2107  
2108  
2109  
2110  
2111  
2112  
2113  
2114  
2115  
2116  
2117  
2118  
2119  
2120  
2121  
2122  
2123  
2124  
2125  
2126  
2127  
2128  
2129  
2130  
2131  
2132  
2133  
2134  
2135  
2136  
2137  
2138  
2139  
2140  
2141  
2142  
2143  
2144  
2145  
2146  
2147  
2148  
2149  
2150  
2151  
2152  
2153  
2154  
2155  
2156  
2157  
2158  
2159  
2160  
2161  
2162  
2163  
2164  
2165  
2166  
2167  
2168  
2169  
2170  
2171  
2172  
2173  
2174  
2175  
2176  
2177  
2178  
2179  
2180  
2181  
2182  
2183  
2184  
2185  
2186  
2187  
2188  
2189  
2190  
2191  
2192  
2193  
2194  
2195  
2196  
2197  
2198  
2199  
2200  
2201  
2202  
2203  
2204  
2205  
2206  
2207  
2208  
2209  
2210  
2211  
2212  
2213  
2214  
2215  
2216  
22

1 V3-cBot-HS, Illumina). The flowcells were sequenced for 150 bp pair end reads on HiSeq X  
2  
3  
4 Ten platform and more than 90G clean data were generated.

### 3 *Data analysis*

4 The reads coverage situation for one integration is shown in Figure 3. Four steps were  
5 implemented to detect virus integration:

#### 6 1. Alignment

7 We use bwa-meth [12] to align bisulfite treated sequencing reads to a hybrid reference that  
8 contains both human genome and virus sequences. For chimeric reads from the junction parts,  
9 BWA-MEM [23] will align it to one organism and mark the unmapped part as soft clipping,  
10 which is in fact from the other organism. This enables us to find breakpoints directly from the  
11 alignment.

#### 12 2. Clustering

13 After alignment, the result was filtered. We select read pairs with one read match by the  
14 following criterion: the Phred-scaled mapping quality is bigger than 30 ( $\geq 30$ ), and at least  
15 one soft clipping is longer than 5 bp ( $\geq 5$ ). The mapped parts of reads, which is marked as  
16 "M" by its CIGAR string, cover the human reference genome. For paired reads, we also add  
17 the gap between two mapped reads to their covered region, making read 1 and read 2 be  
18 continuously covered on the human reference. Each continuous region with at least 1 bp  
19 overlap is defined as a cluster. All reads involved are selected to form the cluster. The  
20 remaining soft clippings are viral junction candidates. Read pairs with one read mapped on  
21 virus also indicate a potential virus junction between the read pair.

1 3. Assembling

2  
3  
4 Within one cluster, all soft clipping start sites are collected. The position with the most  
5  
6  
7 abundance of start sites is identified as the most likely candidate breakpoint. All clipping  
8  
9  
10 sequences in the cluster are extracted and aligned together. A restore algorithm was used to  
11  
12  
13 calculate the most possible base in each position based on the aligned bases and its sequencing  
14  
15  
16 quality. The algorithm is based on a Bayesian model, where we compute the posteriori  
17  
18  
19 probability estimation for A, C, G, T as:

$$\begin{aligned} P(T_i | D) &= \frac{P(T_{Wi})P(D | T_{Wi})}{\sum_{x=1}^S P(T_{Wx})P(D | T_{Wx})} \times \frac{P(T_{Ci})P(D | T_{Ci})}{\sum_{x=1}^S P(T_{Cx})P(D | T_{Cx})} \\ &= C_0 \times P(D | T_{Wi}) \times P(D | T_{Ci}) \\ C_0 &= \frac{P(T_{Wi})}{\sum_{x=1}^S P(T_{Wx})P(D | T_{Wx})} \times \frac{P(T_{Ci})}{\sum_{x=1}^S P(T_{Cx})P(D | T_{Cx})} \end{aligned} \quad (1)$$

8  
9 Here, D is the observation of the NGS reads on given position. P(T<sub>i</sub>|D) is the likelihood  
10 component, which can be interpreted as the probability of observing D when the true genotype  
11 is T<sub>i</sub>. D<sub>W</sub> be a realization (or observation) of the NGS reads in the Watson strand. D<sub>C</sub> be a  
12 realization (or observation) of the NGS reads in Crick strand. P(T<sub>Wi</sub>|D) is the likelihood  
13 component, which can be interpreted as the probability of observing D when the true genotype  
14 is T<sub>Wi</sub>. P(T<sub>Ci</sub>|D) is the likelihood component, which can be interpreted as the probability of  
15 observing D when the true genotype is T<sub>Ci</sub>. At each virus location, prior probability P(T<sub>i</sub>) of  
16 each genotype T<sub>i</sub> was set according to the Table S5. The likelihood P(D|T<sub>i</sub>) for the assumed  
17 genotype T<sub>i</sub> was calculated from the observed allele types in the sequencing reads in formula  
18 2. Thus, on the Watson strand it is P(D<sub>W</sub>|T<sub>i</sub>), on the Crick strand it is P(D<sub>C</sub>|T<sub>i</sub>). We defined the  
19 likelihood of observing allele d<sub>k</sub> in a read for a possible haploid genotype T as P(d<sub>k</sub>|T), and on

1 the Watson strand it is  $P(d_{wk}|T)$ , and on the Crick strand it is  $P(d_{ck}|T)$ . So, for a set of  $n$   
 2 observed alleles at a locus,  $D = \{d_1, d_2, \dots, d_n\}$  on each strand, these probabilities are  
 3 computed as shown by formula 3 & 4, where  $Q$  stands for the base quality from the fastaq file.

$$P(D_w | T_i) = \prod_{k=1}^m P(d_{wk} | T), P(D_c | T_i) = \prod_{k=1}^n P(d_{ck} | T). \quad (2)$$

$$P(d_{wk} | T) = \begin{cases} 1 - 10^{-\frac{Q}{10}} & (T \in \{A, C, G\}) \\ \frac{1 - 10^{-\frac{Q}{10}}}{2} & (T \in \{T\}) \end{cases}, \quad (3)$$

$$P(d_{ck} | T) = \begin{cases} 1 - 10^{-\frac{Q}{10}} & (T \in \{C, G, T\}) \\ \frac{1 - 10^{-\frac{Q}{10}}}{2} & (T \in \{A\}) \end{cases}. \quad (4)$$

6 We used “Y” and “R” to represent C/T and G/A respectively (IUPAC nucleotide code). If a  
 7 region is covered by both the Watson strand and the Crick strand, we were able to deduce the  
 8 original base from Y or R by calculation.

#### 9 4. Detection of viral integrations

10 The assembled clipping regions above were mapped to the given virus reference sequence  
 11 with a Smith-Waterman local alignment tool from the EMBOSS package [24], which supports  
 12 IUPAC DNA codes Y and R. Virus fragment location is extracted from the alignment results.

## 13 Discussion

14 In summary, we have implemented the first software tool to detect virus integration using BS  
 15 data. Our software is based on bwa-meth, and by assembling and aligning soft-clip regions, it  
 16 can find the virus breakpoints. However, accuracy of reads surrounding the breakpoints needs  
 17 to be further improved. A virus usually integrates into regions that are homologous to both  
 18 human and virus (micro-homologous) [25]. Therefore, we consider breakpoints predicted by  
 19 our software tool as being correctly identified that are within 10 bp of a real breakpoint

(Figure S2). With this definition, the accuracy of our predicted breakpoints can reach over 70%. Our results will be useful for analyzing BS data and related applications. Some of the results come with only location on human genome, and has the virus location missing. This may be due to the shortage of virus fragments. We simulated three kinds of reads, PE50, 90, and 150 with various lengths, and further simulated virus-inserted fragment with different length as well (Table S6), thus all cases described in Figure 2 are mimicked here. All simulation sampled all possible reads, base by base with fixed insert size. As the result in Table S6 showed, the longer the reads, the more accurate the prediction can be achieved. In particular, for read lengths around 50 bp, BS-virus-finder is capable to find the virus integration with an accuracy of more than 70%; for the read lengths between 90bp and 150bp, BS-virus-finder is capable to find the virus integration with an accuracy of more than 90%. Besides simulated data, we have performed WGS and WGBS sequencing of the PLC/PRF/5 hepatocellular carcinoma cell line (Table S4). As the results showed, when the length of input is larger than 150bp, the analysis result of WGBS is similar to the one of WGS. Additionally, BS-virus-finder is able to find breakpoints in 8 out of 9 regions which are identified by FISH [8]. Based on these experimental results, we believe that BS-virus-finder is a powerful software tool to analyze virus-integration using BS data.

18  
19 **Availability and requirements**

- 20 Project Name: BS-virus-finder: virus integration calling using bisulfite-sequencing data
- 21 Project home page: <https://github.com/BGI-SZ/BSVF> [26]
- 22 Operating system: Linux

1 Programming language: Perl, Python, C

2 License: LGPL v3

3 Research Resource Identifier: BSVF, RRID: SCR\_015727

4

## 5 **Availability of supporting data**

6 Data used in this paper is simulated based on random insertion of HBV sequence to human

7 chromosome 1 sequence. A Perl script named “simVirusInserts.pl” is included, and our

8 simulation schema is coded within. We have run the simulation several times and the result

9 shows no significant difference. The PLC/PRF/5 hepatocellular carcinoma cell lines were

10 from American Type Culture Collection (ATCC, Manassas, VA) and sequenced by HiSeq X

11 Ten System from Novogene company. WGS and WGBA data have been submitted to NCBI

12 SRA project PRJNA400455. Supporting data, an archival copy of the code and the Perl script

13 “simVirusInserts.pl” are also available via the *GigaScience* repository GigaDB [27].

14

15

16

## 17 **Competing interests**

18 The authors declare that they have no competing interests.

19

## 20 **Authors' contributions**

21 CP, LB and HY conceptualized the project. SG, XH, SL and JW designed BSVF and

22 developed its accompanying utilities. SG, XH, CG, XZ, MW and SZ developed the protocol.

23 FX, DF, HC and JB conducted experiments. SG, XH, BL and SW undertook the analysis. KX,

1  
2  
3  
4  
5  
6  
7  
8  
9  
10  
11  
12  
13  
14  
15  
16  
17  
18  
19  
20  
21  
22  
23  
24  
25  
26  
27  
28  
29  
30  
31  
32  
33  
34  
35  
36  
37  
38  
39  
40  
41  
42  
43  
44  
45  
46  
47  
48  
49  
50  
51  
52  
53  
54  
55  
56  
57  
58  
59  
60  
61  
62  
63  
64  
65

1 LM, SG, XH, LB and CP wrote and approved the final version of the manuscript. All authors  
2 read and approved the final manuscript.  
3

#### 4 **Acknowledgements**

5 We appreciate the supporting of Xiaolin Liang and Hengtong Li in College of Mathematics &  
6 Statistics, Changsha University of Science & Technology, for their contributing advice to our  
7 research. This work was funded by the National Natural Science Foundation of China  
8 (81602477) and Shenzhen Municipal Government of China (ZDSYS201507301424148).  
9

#### 10 **References**

- 11 1. Wang Y, Shang Y: Epigenetic control of epithelial-to-mesenchymal transition and  
12 cancer metastasis. *Experimental cell research* 2013, 319(2):160-169.
- 13 2. O'Doherty AM, Magee DA, O'Shea LC, Forde N, Beltman ME, Mamo S, Fair T: DNA  
14 methylation dynamics at imprinted genes during bovine pre-implantation embryo  
15 development. *BMC developmental biology* 2015, 15:13.
- 16 3. Cotton AM, Price EM, Jones MJ, Balaton BP, Kobor MS, Brown CJ: Landscape of DNA  
17 methylation on the X chromosome reflects CpG density, functional chromatin state  
18 and X-chromosome inactivation. *Human molecular genetics* 2015, 24(6):1528-1539.
- 19 4. Kamdar SN, Ho LT, Kron KJ, Isserlin R, van der Kwast T, Zlotta AR, Fleshner NE,  
20 Bader G, Bapat B: Dynamic interplay between locus-specific DNA methylation and  
21 hydroxymethylation regulates distinct biological pathways in prostate  
22 carcinogenesis. *Clinical epigenetics* 2016, 8:32.
- 23 5. Haldrup C, Mundbjerg K, Vestergaard EM, Lamy P, Wild P, Schulz WA, Arsov C,  
24 Visakorpi T, Borre M, Hoyer S et al: DNA methylation signatures for prediction of  
25 biochemical recurrence after radical prostatectomy of clinically localized prostate  
26 cancer. *Journal of clinical oncology : official journal of the American Society of  
27 Clinical Oncology* 2013, 31(26):3250-3258.
- 28 6. Kim JH, Dhanasekaran SM, Prensner JR, Cao X, Robinson D, Kalyana-Sundaram S,  
29 Huang C, Shankar S, Jing X, Iyer M et al: Deep sequencing reveals distinct patterns of  
30 DNA methylation in prostate cancer. *Genome research* 2011, 21(7):1028-1041.
- 31 7. Darst RP, Pardo CE, Ai L, Brown KD, Kladde MP: Bisulfite sequencing of DNA.  
32 *Current protocols in molecular biology / edited by Frederick M Ausubel [et al]*  
33 2010, Chapter 7:Unit 7 9 1-17.

1  
2  
3  
4  
5  
6  
7  
8  
9  
10  
11  
12  
13  
14  
15  
16  
17  
18  
19  
20  
21  
22  
23  
24  
25  
26  
27  
28  
29  
30  
31  
32  
33  
34  
35  
36  
37  
38  
39  
40  
41  
42  
43  
44  
45  
46  
47  
48  
49  
50  
51  
52  
53  
54  
55  
56  
57  
58  
59  
60  
61  
62  
63  
64  
65

8. Watanabe Y, Yamamoto H, Oikawa R, Toyota M, Yamamoto M, Kokudo N, Tanaka S, Arai S, Yotsuyanagi H, Koike K et al: DNA methylation at hepatitis B viral integrants is associated with methylation at flanking human genomic sequences. *Genome research* 2015, 25(3):328-337.
9. Lillsunde Larsson G, Helenius G, Sorbe B, Karlsson MG: Viral load, integration and methylation of E2BS3 and 4 in human papilloma virus (HPV) 16-positive vaginal and vulvar carcinomas. *PloS one* 2014, 9(11):e112839.
10. Xi Y, Li W: BSMAP: whole genome bisulfite sequence MAPping program. *BMC bioinformatics* 2009, 10:232.
11. Krueger F, Andrews SR: Bismark: a flexible aligner and methylation caller for Bisulfite-Seq applications. *Bioinformatics* 2011, 27(11):1571-1572.
12. Pedersen BS EK, De S, Yang IV, Schwartz DA: Fast and accurate alignment of long bisulfite-seq reads. eprint arXiv 2014.
13. Zhang Y, Liu H, Lv J, Xiao X, Zhu J, Liu X, Su J, Li X, Wu Q, Wang F et al: QDMR: a quantitative method for identification of differentially methylated regions by entropy. *Nucleic acids research* 2011, 39(9):e58.
14. Stockwell PA, Chatterjee A, Rodger EJ, Morison IM: DMAP: differential methylation analysis package for RRBS and WGBS data. *Bioinformatics* 2014.
15. Gao S, Zou D, Mao L, Zhou Q, Jia W, Huang Y, Zhao S, Chen G, Wu S, Li D et al: SMAP: a streamlined methylation analysis pipeline for bisulfite sequencing. *GigaScience* 2015, 4:29.
16. Gao S, Zou D, Mao L, Liu H, Song P, Chen Y, Zhao S, Gao C, Li X, Gao Z et al: BS-SNPer: SNP calling in bisulfite-seq data. *Bioinformatics* 2015, 31(24):4006-4008.
17. Liu Y, Siegmund KD, Laird PW, Berman BP: Bis-SNP: Combined DNA methylation and SNP calling for Bisulfite-seq data. *Genome biology* 2012, 13(7):R61.
18. Jiang P, Sun K, Lun FM, Guo AM, Wang H, Chan KC, Chiu RW, Lo YM, Sun H: Methy-Pipe: an integrated bioinformatics pipeline for whole genome bisulfite sequencing data analysis. *PloS one* 2014, 9(6):e100360.
19. Carr BI, Cavallini A, Lippolis C, D'Alessandro R, Messa C, Refolo MG, Tafaro A: Fluoro-Sorafenib (Regorafenib) effects on hepatoma cells: growth inhibition, quiescence, and recovery. *J Cell Physiol* 2013, 228(2):292-297.
20. Forster M, Szymczak S, Ellinghaus D, Hemmrich G, Ruhlemann M, Kraemer L, Mucha S, Wienbrandt L, Stanulla M, Group UFOSCwI-BS et al: Vy-PER: eliminating false positive detection of virus integration events in next generation sequencing data. *Sci Rep* 2015, 5:11534.
21. Ho DW, Sze KM, Ng IO: Virus-Clip: a fast and memory-efficient viral integration site detection tool at single-base resolution with annotation capability. *Oncotarget* 2015, 6(25):20959-20963.
22. Wang Q, Jia P, Zhao Z: VERSE: a novel approach to detect virus integration in host genomes through reference genome customization. *Genome Med* 2015, 7(1):2.
23. Li H: Aligning sequence reads, clone sequences and assembly contigs with BWA-MEM. eprint arXiv 2013:3.



- 1 24. Rice P, Longden I, Bleasby A: EMBOSS: the European Molecular Biology Open  
2 Software Suite. *Trends in genetics* : TIG 2000, 16(6):276-277.  
3 25. Hu Z, Zhu D, Wang W, Li W, Jia W, Zeng X, Ding W, Yu L, Wang X, Wang L et al:  
4 Genome-wide profiling of HPV integration in cervical cancer identifies clustered  
5 genomic hot spots and a potential microhomology-mediated integration mechanism.  
6 *Nature genetics* 2015, 47(2):158-163.  
7 26. Bisulfite Sequencing Virus integration Finder. <https://github.com/BGI-SZ/BSVF>.  
8 Accessed 16 Oct 2017.  
9 27. Gao S, Hu X, Xu F, Gao C, Xiong K, Zhao X, et al. Supporting data for “BS-virus-finder:  
10 virus integration calling using bisulfite-sequencing data”. *GigaScience* database. 2017.  
11 <http://dx.doi.org/10.5524/100377>

12  
13  
14  
15  
16 **Table 1. The comparison of BS-virus-finder with other software using real**  
17 **data.**  
18

| Chr    | BSVF      |      |      | Vy-per    |      |      | virus-clip |      |      | Virus Finder2 |      |      |
|--------|-----------|------|------|-----------|------|------|------------|------|------|---------------|------|------|
|        | HB        | VB   | VE   | HB        | VB   | VE   | HB         | VB   | VE   | HB            | VB   | VE   |
| chr1   | 143272758 | 2945 | 3102 |           |      |      |            |      |      |               |      |      |
| chr2   | -         |      |      | -         |      |      | 52018758   | 207  | 281  |               |      |      |
| chr3*  | 131451702 | 1212 | 1322 | -         |      |      | 131451701  | 1282 | 1403 | 131451701     | 1405 |      |
| chr3*  | 131453124 | 1416 | 1515 | -         |      |      | 131453353  | 1416 | 1538 |               |      |      |
| chr4*  | 180586417 | 136  | 378  |           |      |      |            |      |      | 180586416     | 59   |      |
| chr4*  | 180587608 | 394  | 594  | 180586607 | 167  | 231  | 180587608  | 500  | 632  | 180587607     | 634  |      |
| chr5*  | 1297478   | 1174 | 1315 | -         |      |      | 1297478    | 1241 | 1385 | 1297477       | 1388 |      |
| chr7   | 110894616 | 2739 | 2748 |           |      |      |            |      |      |               |      |      |
| chr8*  | 35446380  | 2389 | 2459 | 35446214  | 2402 | 2455 | 35446601   | 2390 | 2519 | 35446392      | 2396 | 2608 |
| chr8   | -         |      |      |           |      |      | 106944290  | 698  | 1077 |               |      |      |
| chr11* | 65040943  | 2631 | 2767 | -         |      |      | -          |      |      | 65040964      | 2532 |      |
| chr12* | 109573899 | 721  | 815  | 109573677 | 668  | 734  | 109573899  | 705  | 815  |               |      |      |
| chr13  | 33088123  | 1521 | 1603 | -         |      |      | -          |      |      |               |      |      |
| chr13  | 33088561  | 1917 | 2066 | -         |      |      | 33088561   | 1995 | 2133 | 33088560      | 2133 |      |
| chr16* | 69947046  | 2055 | 2826 |           |      |      |            |      |      |               |      |      |
| chr16* | 70169959  | 2055 | 2735 |           |      |      |            |      |      | 70169971      | 2064 | 2240 |
| chr16  | 74425602  | 2062 | 2665 |           |      |      |            |      |      |               |      |      |
| chr17* | 82105786  | 407  | 489  | 82105984  | 368  | 435  | 82105783   | 347  | 489  |               |      |      |
| chr17* | 82107626  | 2177 | 2321 | -         |      |      | 82107710   | 2048 | 2159 | 82107625      | 2045 |      |
| chr19  | 41783064  | 687  | 804  | -         |      |      | 41782971   | 761  | 905  |               |      |      |
| chr20  | 20473566  | 2415 | 2565 |           |      |      |            |      |      |               |      |      |

19  
20 BSVF used WGBS data, and other software used WGS data.

21 \* supported by previous FISH experiments [8].

22 HB: Host breakpoint.

23 VB: Virus Begin is the revealed left most position on virus.

24 VE: Virus End is the right most position on virus.

25

1  
2  
3  
4  
5  
6  
7  
8  
9  
10  
11  
12  
13  
14  
15  
16  
17  
18  
19  
20  
21  
22  
23  
24  
25  
26  
27  
28  
29  
30  
31  
32  
33  
34  
35  
36  
37  
38  
39  
40  
41  
42  
43  
44  
45  
46  
47  
48  
49  
50  
51  
52  
53  
54  
55  
56  
57  
58  
59  
60  
61  
62  
63  
64  
65

1  
2  
3  
4  
5  
6  
7  
8  
9  
10  
11  
12  
13  
14  
15

**Figure 1. The illustration of bisulfite-altered sequence to the original.**

**Figure 2. Principal types of mapping reads around the viral integration site.**

**Figure 3. A demo plot of one viral integration cluster in its pre-insertion form.**

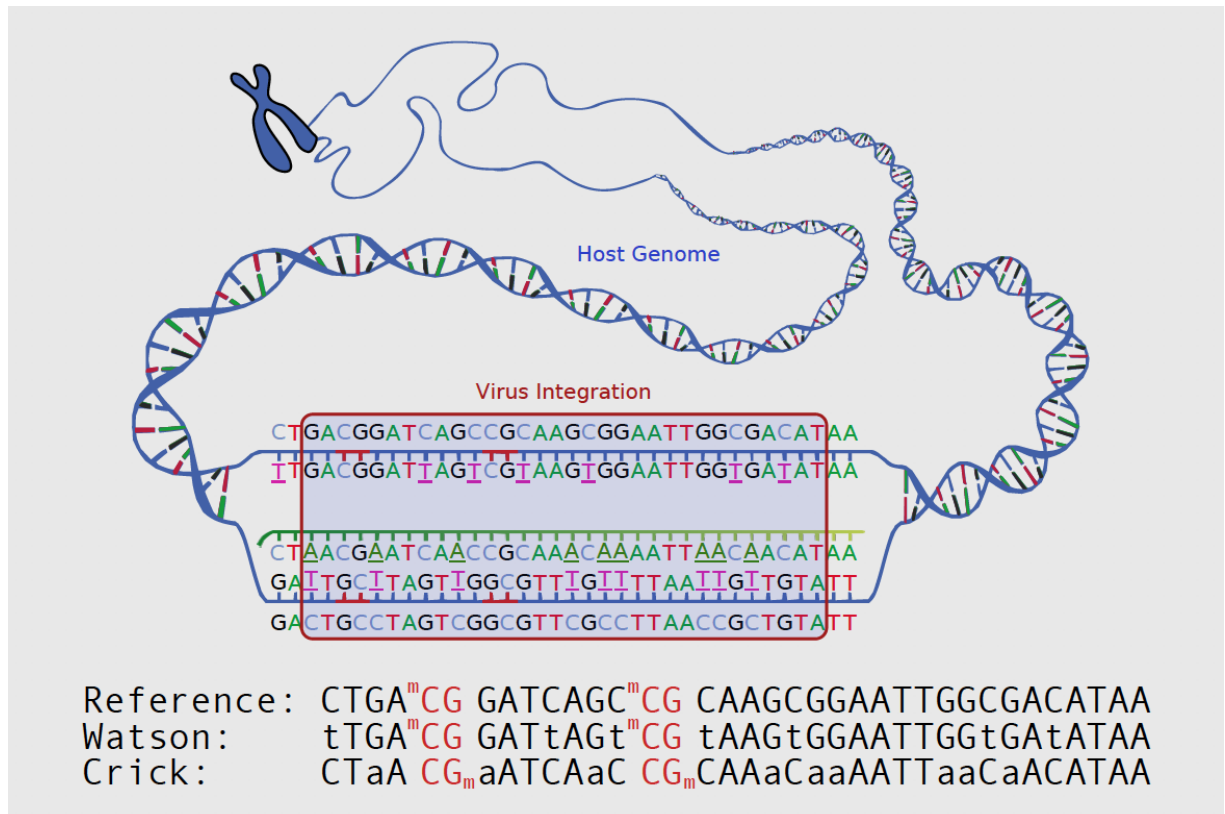

1

2 **Figure 1. The illustration of bisulfite-altered sequence to the original.**3 Reference is the original sequence prior to bisulfite treatment. After directional library preparation, we  
4 have two different conversion: Watson and Crick strand.5 Methylation sites were showed as red bases. Bisulfite treated base may alter the original base from C to  
6 T. m indicated methylation-modified base. Low-case letter indicates the bisulfite-altered base.7 As we can see, half of the probability of each T is C in Watson strand and half of the probability of each  
8 A is G in Crick strand.

9

10

11

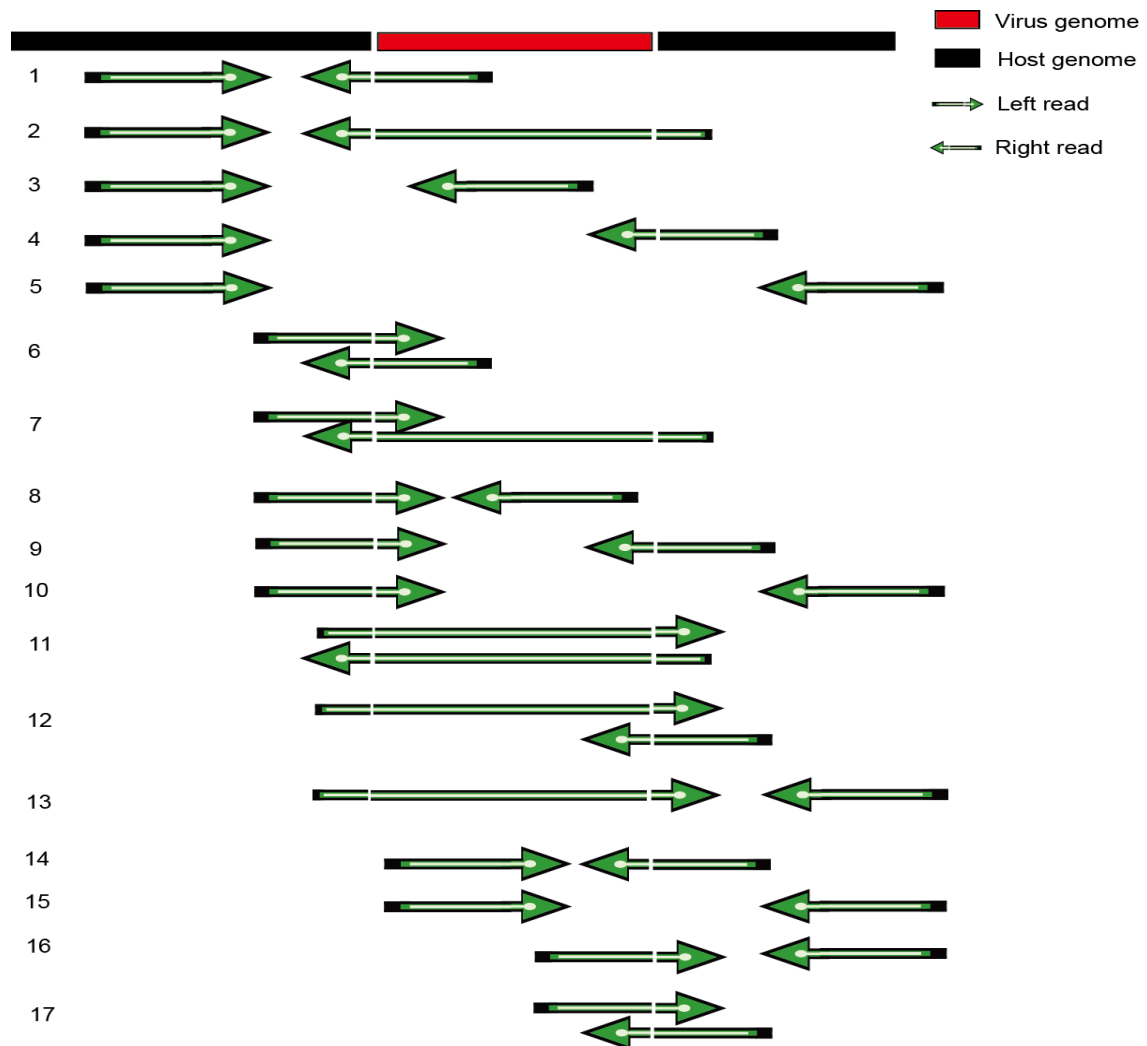

1  
 2 **Figure 2. Principal types of mapping reads around the viral integration site.**  
 3 Red bar, the virus sequence inserted in host genome; Green arrow, mapping reads with different  
 4 directions; Breakpoints indicate logical division between host genome and virus, which are physically  
 5 linked.

6  
 7  
 8  
 9  
 10  
 11

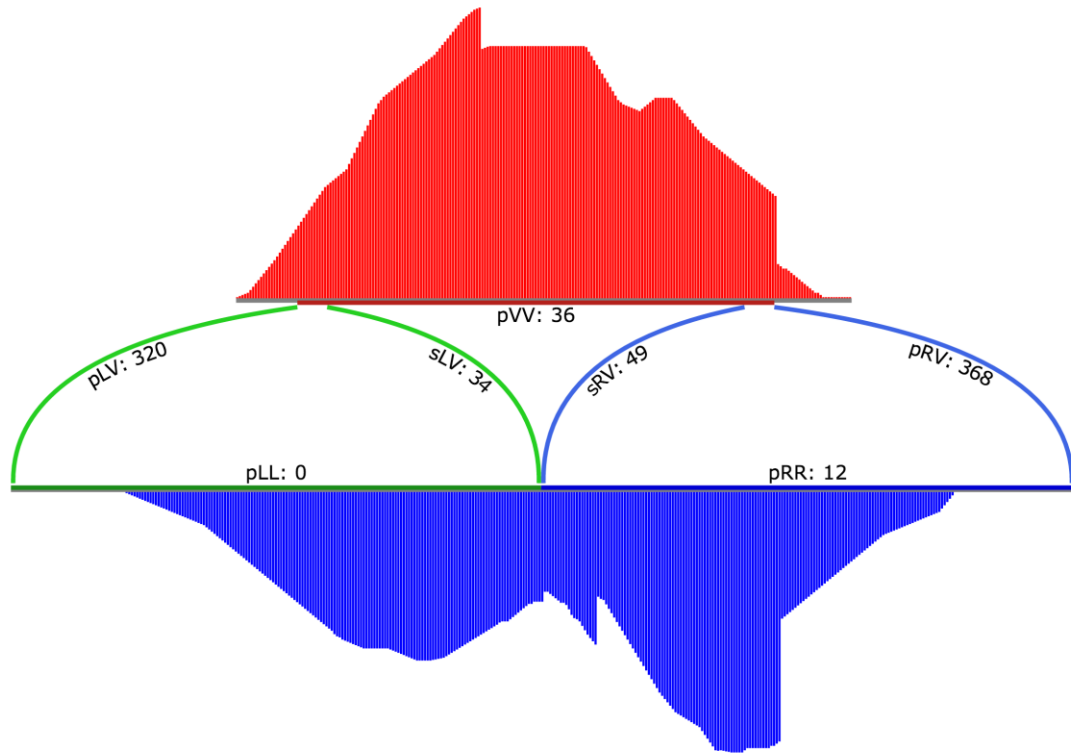

1  
2  
3  
4  
5  
6  
7  
8  
9  
10  
11  
12

**Figure 3. A demo plot of one viral integration cluster in its pre-insertion form.**

Plot was randomly selected from simulated breakpoints.

The red virus fragment(V) above will be inserted into the center point of the green(L) and blue(R) human fragment below to form the sequenced sample. Bars show the coverage depth of sequencing reads.

Curves represent the linkage events supported by pair-end sequencing reads, and the number besides shows the read count.

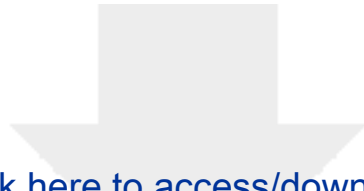

Click here to access/download  
**Supplementary Material**  
Supplementary-bsfinder.docx

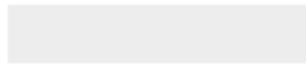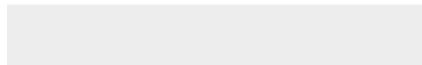

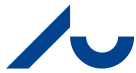

AARHUS  
UNIVERSITY

BIOINFORMATICS RESEARCH CENTRE (BIRC)

GigaScience Editorial Office

---

### Submission of final version of paper

Dear Editor in Chief

Thank you very much for accepting our paper "BS-virus-finder: virus integration calling using bisulfite-sequencing data" (GIGA-D-17-00032R1) cf. your e-mail dated September 29, 2017. We have addressed the points raised by the reviewers to the best of our abilities, and as outlined in our response to reviewers. We hope that you find everything in order.

Kind regards



Christian Nørgaard Storm Pedersen  
(on behalf of all the authors of the paper)

**Bioinformatics Research  
Centre (BiRC)**

**Christian Nørgaard Storm  
Pedersen**

Centre director, Associate  
professor

Date: 17 October 2017

Direct Tel.: +45 87155559  
Mobile Tel.: +45 27782810  
E-mail: cstorm@birc.au.dk

Web: au.dk/en/cstorm@birc

Sender's CVR no.: 31119103

Page 1 / 1
